# Supplementary material for: Inclusion of children and youth in the Intergovernmental Panel on Climate Change Assessment Reports (AR1-AR6)
Source: Research Square preprint supplement (doi:10.21203/rs.3.rs-4192923/v1), 2024-08-05
Supplement: Supplementary file 1 [file 49e7e1b0df0aec0755b7ab9e.xlsx]

## Sheet: Rev Data extraction
Terms related to children (child, children, girl(s), boy(s), baby/babies and infant(s))				Terms related to youth (adolescent(s), young man/wen/ young woman/women, young person/people and youth)					Derived Child	Derived youth	Children (1 reference max per paragraph)	Youth (1 reference max per paragraph)	WG #	Chapter #	Chapter title - WG2	Chapter title - WG3	Section #	Section Title	Subsection	Page #	Quote	Climate risks		Climate responses	Co-benefits	Lenses/frameworks - 1	Lenses/frameworks - 2	Line list
Baby/Infant	Child/children/minor	Girl	Boy	Youth/young person	Young man	Young woman	Adolescent	Teenager	Derived Child	Derived youth	Children	Youth	WG #	Chapter # SPM	Chapter title - WG2	Chapter title - WG3	Section #	Section Title	Subsection	Page #	Quote	Climate risk 1	Climate risk 1	Climate response	Co-benefit	Lense/framework - 1	Lens/framework - 2	Line list
				1					0	1		1	3	5		05-Demand, Services and Social Aspects of Mitigation	5.4		5.4.2 Socio-cultural drivers of climate mitigation	557	Climate social movements ... aim to increase a sense of agency amongst certain social groups (e.g. young people or indigenous communities) that structural change is possible. Climate strikes have become internationally prevalent, for example the September 2019 strikes involved participants in more than 180 countries (Rosane 2019; Fisher and Nasrin 2020; Martiskainen et al. 2020). Enabled by digit…			Collective action and social organising	Voice and political engagement	Activism
				1					0	1		1	3	5		05-Demand, Services and Social Aspects of Mitigation	ES	Exec Summary	Exec Summary	506	Collective action as part of social or lifestyle movements underpins system change (high 21 confidence). Collective action and social organising are crucial to shift the possibility space of public 22 policy on climate change mitigation. For example, climate strikes have given voice to youth in more 23 than 180 countries. In other instances, mitigation policies allow the active participation of a…			Collective action and social organising	Voice and political engagement	Activism
				1					0	1		1	3	17		17-Accelerating the Transition in the Context of Sustainable Development	17.4		17.4.1.1 Social movements and education	1765	Sustainable development and deep decarbonization will involve people and communities being 8 connected locally through various means – including globally via the internet and digital technologies 9 (Bradbury 2015; Scharmer 2018; Scharmer, C, Kaufer 2015) –in ways that form social fields that allow 10 sustainability to unfold (see also Gillard et al. 2016) and that prompt other shifts in thinking …			Collective action and social organising		Activism
	1			1					1	1	1	1	2	17	17-Decision-Making Options for Managing Risk		17.4	Enabling and Catalysing Conditions for Adaptation and Risk Management	17.4.5.4 Catalysing Agents	2599	These movements usually focus on climate mitigation but sometimes include adaptation. Their social bases include groups which had not previously been active in climate politics, notably children and youth, as well as sectors with long traditions of environmental activism, such as women and Indigenous Peoples (see Cross-Chapter Boxes GENDER and INDIG in Chapter 18).Much of the literature on youth …			Collective action and social organising		Activism	Justice
				1					0	1		1	3	16		16-Innovation, Technology Development and Transfer	16.3	16.3 A systemic view of technological innovation processes	Table 16.7 Commonly used quantitative innovation metrics, organized by inputs, outputs and outcomes	1666	Table 16.7 Commonly used quantitative innovation metrics, organized by inputs, outputs and outcomes. Creation of legitimacy -- Youth and public demonstration			Collective action and social organising		Activism
				1					0	1		1	2	16	16-Key Risks across Sectors and Regions		16.1	16.1 Introduction and Framing	16.1.1 Objective of the Chapte	2418	Many people, especially youth, around the world are calling for urgency, ambition and action. Companies are wondering how to manage new threats to their bottom line, or how to grasp new opportunities. On top of this growing concern about climate change, the coronavirus disease 2019 (COVID-19) pandemic has exposed vulnerabilities to shocks, significantly aggravated climate-related risks, and posed…			Collective action and social organising		Activism
				1					0	1		1	3	14		14-International Cooperation	14.5		14.5.3 Civil society and social movement	1508	The Paris Agreement’s preamble explicitly recognises the importance of engaging “various actors” in addressing climate change, and the decision adopting the Agreement created the Non-State Actor Zone for Climate Action platform to aid in scaling up these efforts. Specific initiatives have also been taken to facilitate participation of particular groups, such as the UNFCCC’s Local Communities and …			Collective action and social organising		Activism
				1					0	1		1	3	14		14-International Cooperation	14.6	Synthesis	Table 14.5 Illustrative examples of multi-level governance addressing criteria of effectiveness	1515	Youth climate movement raising mitigation and fossil fuel divestment on political agendas and in financial sector			Collective action and social organising		Activism
				1					0	1		1	3	13		13-National and Sub-national Policies and Institutions	13.4		13.4.1 Actors and agency in the public process	1375	In March 2019, the first global climate strike took place, turning out more than 1 million people around the world (Carrington 2019). Six months later in September 2019, young people and adults responded to a call 3 to participate in climate strikes as part of the ‘Global Week for Future’ surrounding the UN Climate Action 4 Summit (Thunberg 2019), and the number of participants globally jumped to…			Collective action and social organising		Activism
				1					0	1		1	3	13		13-National and Sub-national Policies and Institutions	13.4	Actors and agency in the public process	Actors and agency in the public process	1375	Although digital activism makes it easier to connect globally, it is unclear how digital technology will affect the youth climate movement, and its effects on carbon emissions. Research suggests that online activism is likely to involve a more limited range of participants and perspectives (Bennett 2013; Elliott and Earl 2018). Digital tactics could also mean that groups are less embedded in comm…			Collective action and social organising		Activism
				1					0	1		1	2	12	12-Central and South America		12.7	Knowledge Gaps	12.7.2 Knowledge Gaps by Sector	1762	Regarding the relation of social movements and climate-change adaptation, institutions and politics, two major issues stand out: youth movements for climate change and the resistances, mainly urban, to climate-change adaptation policies. Little connection is found in research concentrating on resistance to climate-change adaptation policies and their interaction with the politics of place. Confli…			Collective action and social organising		Activism
				1					0	1		1	2	6	06-Cities Settlements and Key Infrastructure		6.1		6.1.1 Background and Chapter Outline	912	Voluntary, networked action led by cities was also illustrated by a November 2019 call to Mayors and youth climate activists to sign a voluntary pledge in a ‘Race to Zero’ ahead of the Conference of the Parties 26, which included endorsing principles of a New Green Deal (C40, 2019).			Collective action and social organising		Activism
				1					0	1		1	2	6	06-Cities Settlements and Key Infrastructure		6.4		6.4.3.4 Enables the Co-production of Adaptation Strategies with Citizens	973	Youth movements such as Forum for Future have joined forces with other environmental and Indigenous organisations to lobby governments and institutions to action (Kenis, 2021; Fisher and Nasrin, 2021; Davies and Hügel, 2021; Hayward, 2021).			Collective action and social organising		Activism
				1					0	1		1	2	6	06-Cities Settlements and Key Infrastructure		6.4		6.4.3.6 Supports Visionary and Imaginative Design	974	Social movements can be powerful sources of such alternative visions of the future, as exemplified by recent Youth Climate Strikes and Extinction Rebellion (limited evidence, medium agreement). Community protest such as Youth Climate Strikes have influenced urban climate policy agendas including the declaration of climate emergency in municipalities worldwide, fostering a new debate on climate ch…			Collective action and social organising		Activism
				1					0	1		1	2	6	06-Cities Settlements and Key Infrastructure		Executive Summary		Executive Summary	911	Participatory planning for infrastructure provision and risk management to address climate change and underlying drivers of risk in informal and under- serviced neighbourhoods, the inclusion of Indigenous knowledge and local knowledge, communication and efforts to build local leadership, especially among women and youth, are examples of inclusive approaches with co-benefits for equity. Providing …			Governance and planning		Activism	Participation
				1					0	1		1	3	5		05-Demand, Services and Social Aspects of Mitigation	5.2	5.2 Services, well-being and equity in demand-side mitigation	5.2.3 Equity, trust, and participation in demand-side mi	525	25 Environmental justice and climate justice activists worldwide have called attention to the links between 26 economic and environmental inequities, collected and publicised data about them, and demanded 27 stronger mitigation (Goodman 2009; Schlosberg and Collins 2014; Jafry et al. 2019; Cheon 28 2020). Youth climate activists, and Indigenous leaders, are also exerting growing political influen…			Collective action and social organising		Activism	Justice
				1					0	1		1	3	5		05-Demand, Services and Social Aspects of Mitigation	5.7	5.7 Knowledge gaps		570	Knowledge gap 4: Dynamic interaction between individual, social, and structural drivers of 46 change 47 Better understanding is required on: (1) More detailed causal mechanisms in the mutual interactions 48 between individual, social, and structural drivers of change and how these vary over time, i.e their relative importance in different transition phases; (2) how narratives associated with spec…			Collective action and social organising		Activism	Justice
				1					0	1		1	2	5	05-Food, Fibre and Other Ecosystem Products		5.1		5.1.3 Chapter Framework	721	FIGURE -- Youth innovation is under adaptation and mitigation in the framework for chapter 5			Collective action and social organising		Activism
				1					0	1		1	3	1		01-Introduction and Framing	1.3	1.3	1.3.3 Some Other Key Trends and Developments	165	Civil society pressures for stronger action. Civic engagement increased leading up to the Paris Agreement 10 (Bäckstrand and Lövbrand 2019) and after. Youth movements in several countries show young people’s 11 awareness about climate change, evidenced by the school strikes for the climate (Hagedorn et al. 2019; 12 Buettner 2020; Walker 2020; Thackeray et al. 2020). Senior figures across many rel…			Collective action and social organising		Activism
				1					0	1		1	2	1	01-Point of Departure and Key Concepts		1.1		1.1.1 A Changing Climate in a Changing World	126	In late 2019, protests calling for strengthened climate action reached an unprecedented level of over 6000 events in 185 countries, with a reported estimate of 7.6 million participants, largely led by the ‘Fridays for Future’ youth movement (Chase-Dunn and Almeida, 2020).			Collective action and social organising		Activism
	1	1	1				1		3	1	1	1	2	9	09-Africa		9.11		9.11.1.2 Human Capital Development and Education	1387	Several studies indicate that experiencing low rainfall, warming temperatures or extreme weather events reduce education attainment and that future climate change may reduce children’s school participation, particularly for agriculturally dependent and poor urban households. In west and central Africa, experiencing lower-than-average rainfall during early life is associated with up to 1.8 fewer y…	Education and play	Nutrition			Gender	Inequality
		1							1	0	1		2	8	08-Poverty, Livelihoods and Sustainable Development		8.5		8.5.2.1 Factors that Support Enabling Environments for Adaptation	1231	The literature shows with high confidence that the poorest groups in society often lose out, and require greater planned adaptation support, having less capacity to adapt than better off groups with easy access to assets (Barbier and Hochard, 2018; Ziervogel, 2019b; Box 8.5). Developing countries such as Burkina Faso, Mali and Zambia are not only among the most vulnerable to climate change, they …	General burden				Gender	Inequality
	1	1					1		2	1	1	1	2	7	07-Health, Wellbeing and the Changing Structure of Communities		7-Exec summary		7-Exec summary	1046	Climate change is expected to have adverse impacts on well-being and to further threaten mental health (very high confidence). Children and adolescents, particularly girls, elderly people, and people with existing mental, physical and medical challenges are particularly at risk. Mental health impacts are expected to arise from exposure to high temperatures, extreme weather events, displacement, m…	Mental health				Gender	Inequality	Yes
	1	1					1		2	1	1	1	2	7	07-Health, Wellbeing and the Changing Structure of Communities		7.3		7.3.1.11 Future Risks Related to Mental Health and Well-Being	1098	Climate change is expected to have adverse impacts on well-being, some of which will become serious enough to threaten mental health (very high confidence). However, changes (Hayes and Poland, 2018) in extreme events due to climate change, including floods (Baryshnikova, 2019), droughts (Carleton, 2017) and hurricanes (Kessler et al., 2008; Boscarino et al., 2013, Boscarino et al., 2017; Obradovi…	Mental health				Gender	Inequality
	1								1	0	1		2	8	08-Poverty, Livelihoods and Sustainable Development		8.4		8.4.5.4 Future Livelihood Challenges in the Context of Risks and Adaptation Limits	1219	The incidence of floods also increases the occurrence of diseases (e.g., diarrhoea and respiratory infections) and undernutrition in children living in informal settlements and slums in Asia (Ghosh, 2018) and Africa (Clark et al., 2020). Women and children are currently bearing the worst impacts of climate hazards, and are unable to move due to assigned gender roles to avoid flooding risks in hig…	Physical health	Nutrition			Gender	Inequality
	1								1	0	1		2	6	06-Cities Settlements and Key Infrastructure		6.2		6.2.2.2 Urban Flooding	926	In addition, emerging research shows the cascading consequences of hazard events, in this case urban flooding, on other risks to well-being in ways that are particularly severe for the urban poor, including mental ill-health, incidents of domestic violence impacting children and women, chronic diseases and salinity of drinking water ((Matsuyama, Khan and Khalequzzaman, 2020); Section 4.2.4.5; Sec…	Violence & CP				Gender	Inequality
	1								1	0	1		2	9	09-Africa		9.4		9.4.5.3 Climate Change Literacy	1319	Age: Elderly populations and young children are most vulnerable to health consequences of heat waves, poor air quality, and climate disasters (Cairncross et al. 2018 (Drivdal 2016; Buyana et al. 2019) (Box 9.1). These groups might not get appropriate food, their mobility might be reduced, education options impaired, and their dependence on others, especially women caregivers may increase (Popoola…	Education and play	Physical health			Gender	Vulnerability
				1					0	1		1	2	7	07-Health, Wellbeing and the Changing Structure of Communities		7.4		7.4.6.7 Inclusive and Integrative Approaches to Climate- Resilient Peace	1123	The 2020 UNEP report on gender and security recommends integrated policy frameworks, better financing to strengthen women’s roles in peacebuilding, integrated programme design, and further research on gender, climate and security linkages. Inclusive approaches recognise that much of the vulnerability that drives conflict risk is generated by existing inequality and marginalisation of large propor…	General burden				Gender	Vulnerability
	1								1	0	1		2	7	07-Health, Wellbeing and the Changing Structure of Communities		7.1		7.1.7.3.7 Vulnerability Experienced through Food Systems	1053	Stresses and shocks associated with climate change are drivers of food insecurity, particularly in sub-Saharan Africa, Asia and Latin America (Betts et al., 2018). The most vulnerable groups include smallholder farmers, pastoralists, agricultural laborers, poorer households, refugees, indigenous groups, women, children, the elderly and those who are socioeconomically marginalised (FAO et al., 201…	Nutrition	Physical health			Gender	Vulnerability	Yes
		1							1	0	1		2	7	07-Health, Wellbeing and the Changing Structure of Communities		7.1		7.1.7.3.7 Vulnerability Experienced through Food Systems	1058	Extreme climate events have immediate and long-term impacts on food insecurity and malnutrition in poor and vulnerable communities, including when women and girls need to undertake additional duties as laborers and caregivers (FAO et al., 2018).	Nutrition				Gender	Vulnerability
		1							1	0	1		2	7	07-Health, Wellbeing and the Changing Structure of Communities		7-Exec summary		7-Exec summary	1045	Climate hazards are associated with increased violence against women, girls and vulnerable groups, and the experience of armed conflict is gendered (medium confidence).	Violence & CP				Gender	Vulnerability	Yes
	1	1							2	0	1		3	9		09-Buildings	9.8	Links to sustainable development	9.8.4 Social well-being/////9.8.4.2 Improved access to energy sources, gender equality and time savings	1003	In most low- and middle-income developing countries women and children (particularly girls) spend a 49 significant amount of their time for gathering fuels for cooking and heating (World Health Organization 50 2016; Rosenthal et al. 2018). For example, in Africa more than 70% of the children living in households 51 that primarily cook with polluting fuels spend at least 15 hours and, in some coun…	Education and play	Violence & CP			Gender
					1				0	1		1	2	7	07-Health, Wellbeing and the Changing Structure of Communities		7-FAQ		FAQ 12.3 | How do climatic events and conditions affect migration and displacement in Central and South America, will this change due to climate change, and how can communities adapt?	1767	The increasing frequency and magnitude of droughts, tropical storms, hurricanes and heavy rains producing landslides and floods have amplified internal movements, overall rural to urban. For instance, rural-to-urban migration in northern Brazil and international migration from Guatemala, Honduras and El Salvador to North America are partly a consequence of prolonged droughts, which have increased…	Migration	Livelihoods			Gender
					1				0	1		1	2	7	07-Health, Wellbeing and the Changing Structure of Communities		7.2		Box 7.4 | Gender Dimensions of Climate-Related Migration	1085	In many cultures, migrants are most often able-bodied, young men (Call et al., 2017; Heaney and Winter, 2016).	Migration				Gender
	1	1							2	0	1		2	4	04-Water		4.7	Benefits and Effectiveness of WaterRelated Adaptations, Their Limits and Trade-Off	4.7.1.2 Benefits, Including Co-benefits of Water-related Adaptation Responses and Resulting Maladaptation	643	Migration also has gendered impacts, with girls from migrating families being taken out of school (Gioli et al., 2014) or interrupting children’s education overall (WarnerandAfifi,2014).	Migration	Education and play			Gender
1									1	0	1		2	18	18-Climate Resilient Development Pathways		18.3	Transitions to Climate Resilient Development	Cross-Chapter Box GENDER | Gender, Climate Justice and Transformative Pathways	2701	Climate-related extreme events also affect women’s health—by increasing the risk of maternal and infant mortality, disrupting access to family planning and prevention of mother to child transmission regimens for human immunodeficiency virus (HIV) positive pregnant women (UNDRR, 2019) (see also Section 7.2). Women and the elderly are also disproportionately affected by heat events (Sections 7.1.7.…	Mortality	Physical health			Gender
	1								1	0	1		2	8	08-Poverty, Livelihoods and Sustainable Development		8.2		8.2.2.2 Observed Impacts and Implications for Structural Inequalities, Gender and Access to Resources	1192	Gender influences the way that people also experience loss and process psychological and emotional distress of losses, such as mortality of children and other relatives in climate-related disasters (Chandra et al., 2017). Women’s capacities are often constrained due to their roles in their household and society, institutional barriers and social norms.	Mortality				Gender
		1							1	0	1		2	7	07-Health, Wellbeing and the Changing Structure of Communities		7.1		Box 7.1	1055	In Uganda, climate change drives indigenous men to increase their distance and time from home and their families in search of water and food, leading to an increase in sexual violence against indigenous women and girls in their communities (Mamo, 2020).	Violence & CP	WASH			Gender
					1				0	1		1	2	7	07-Health, Wellbeing and the Changing Structure of Communities		7.2		7.2.7.4 Gendered Dimensions of Climate-Related Conflict	1088	Motivations for inter-group violence may be influenced by constructions of masculinity, for example the responsibility to secure their family’s survival or pay dowries (Myrttinen et al., 2017), and gendered roles may incentivise young men to protest or to join non-state armed groups during periods of adverse climate (Myrttinen et al., 2015; Myrttinen et al., 2017; Anwar et al., 2019; Hendrix and …	Violence & CP				Gender
	1	1							2	0	1		2	18	18-Climate Resilient Development Pathways		18.3	Transitions to Climate Resilient Development	/18.3.2 Accelerating TransitionsCross-Chapter Box GENDER | Gender, Climate Justice and Transformative Pathways	2701	Climate change is reducing the quantity and quality of safe water available in many regions of the world and increasing domestic water management responsibilities (high confidence). In regions with poor drinking water infrastructure, it is forcing, primarily women and girls, to walk long distances to access water, and limiting time available for other activities, including education and income ge…	WASH	Violence & CP			Gender
	1	1							2	0	1		2	4	04-Water		4.8		4.8.3 Gender, Equity and Social Justice	656	In most societies in developing countries, women and girls are in charge of fetching water. The necessity of water collection takes away time from income-generating activities and education (high confidence) (Fontana and Elson, 2014; Kookana et al., 2016; Yadav and Lal, 2018). In addition, the distances women and girls would have to walk as a result of growing water scarcity due to climate change…	WASH	Education and play			Gender
		1							1	0	1		2	4	04-Water		4.6		4.6.4 Adaptation in the Water, Sanitation and Hygiene Sector	627	During periods of water insecurity, people often implement maladaptive strategies (Magnan et al., 2016), that is, strategies that can increase the risk of adverse health impacts, increase exposure to violence or cause malnutrition (Kher et al., 2015; Pommells et al., 2018; Collins et al., 2019a; Schuster et al., 2020) (medium evidence, high agreement). Examples include walking further, using less…	WASH	Nutrition			Gender
	1	1							2	0	1		2	4	04-Water		4.3		4.3.3 Observed Impacts on Water, Sanitation and Hygiene (WaSH)	587	Climate-induced water scarcity and supply disruptions disproportionately impact women and girls. The necessity of water collection takes away time from income-generating activities, child care and education (Yadav and Lal, 2018; Schuster et al., 2020) (medium evidence, medium agreement). Consumption of larger volumes of water is essential for healthy women during pregnancy, lactation and caregivi…	WASH	Violence & CP			Gender
	1								1	0	1		3	9		09-Buildings	9.8	Links to sustainable development	table 9.4 Aspects of mitigation actions in buildings and their contributions to the 2030 Sustainable 2 Development Goal	1000	SDG 5: Efficient cook-stoves and improved access to electricity and clean fuels in developing countries will result in substantial time savings for women and children, thus increasing the time for rest, communication, education and productive activities.			Built environment	Education and play	Gender
	1								1	0	1		2	18	18-Climate Resilient Development Pathways		18.3	Transitions to Climate Resilient Development	18.3.2 Accelerating Transitions Cross-Chapter Box GENDER | Gender, Climate Justice and Transformative Pathways	2702	Increased access to reproductive health and family planning services, which contributes to climate change resilience and socioeconomic development through improved health and well-being of women and their children, including increased access to education, gender equity and economic status (Onarheim et al., 2016; Starbird et al., 2016; Lopez-Carr, 2017; Hardee et al., 2018) (Section 7.4) (high con…			Economic/health/social systems and protection	General benefit	Gender
		1							1	0	1		2	9	09-Africa		9.7		Box 9.2 | Indigenous knowledge and local knowledge	1331	The diversity of African languages is crucial for climate adaptation. Africa has over 30% of the world’s Indigenous languages (Seti et al., 2016), which are exceptionally rich in ecosystem-specific knowledge on biodiversity, soil systems and water (Oyero, 2007; Mugambiwa, 2018). Taking into consideration the low level of literacy in Africa, especially among women and girls, Indigenous languages h…			Climate-change education	General benefit	Gender
		1							1	0	1		2	7	07-Health, Wellbeing and the Changing Structure of Communities		7.4		7.4.2.6 Multi-sectoral Adaptation for Risks of Malnutrition	1110	Adaptation actions include ... a combination of access to health— including maternal, child and reproductive health— and nutrition services, water and sanitation (high confidence); access to nutrition- sensitive and shock-responsive social protection (high confidence). . . . Common enablers across adaptation actions that enhance the effectiveness and feasibility of the adaptation include: educati…			Community adaptation	Health	Gender	Rights
	1								1	0	1		3	9		09-Buildings	9.8	Links to sustainable development	Table 9.4 Aspects of mitigation actions in buildings and their contributions to the 2030 Sustainable 2 Development Goal	1000	Notes (from table 9.4) SDG1: Sufficiency and efficiency measures result in reduced energy expenditures and other financial savings that further lead to poverty reduction. Access to modern energy forms will largely help alleviate poverty in developing countries as the productive time of women and children will increase, new activities can be developed, etc. The distributional costs of some mitigat…			Built Environment	Livelihoods	Gender
	1								1	0	1		3	9		09-Buildings	9.8	Links to sustainable development	Table notges	998	A growing body of research acknowledges that mitigation actions in buildings may have substantial 32 social and economic value beyond their direct impact of reducing energy consumption and/or GHG 33 emissions (Ürge-Vorsatz et al. 2016; Deng et al. 2017; Reuter et al. 2017; IEA 2014; US EPA 2018; 34 Kamal et al. 2019; Bleyl et al. 2019) (see also Cross-Chapter Box 6 in Chapter 7). In other words, …			Built environment	Livelihoods	Gender		Yes
	1	1							2	0	1		2	7	07-Health, Wellbeing and the Changing Structure of Communities		7.4		7.4.2.6 Multi-sectoral Adaptation for Risks of Malnutrition	1112	Adaptive social protection programmes and mechanisms that can support food insecure households and individuals include cash transfers or public work programmes, land reforms, and extension of credit and insurance services that reduce food insecurity and malnutrition during times of environmental stress (Carter and Janzen, 2018; Johnson et al., 2013; Alderman, 2016). For example, children from fam…			Economic/health/social systems and protection	Nutrition	Gender
	1	1							2	0	1		2	7	07-Health, Wellbeing and the Changing Structure of Communities		7.4		7.4.2.6 Multi-sectoral Adaptation for Risks of Malnutrition	1111	Adaptation to reduce the risk of malnutrition requires multi-sectoral, integrated approaches (very high confidence). Adaptation actions include access to healthy, affordable diverse diets from sustainable food systems (high confidence) ; a combination of access to health—including maternal, child and reproductive health— and nutrition services, water and sanitation (high confidence); access to nu…			Food production/systems	Nutrition	Gender	Rights
				1					0	1		1	2	5	05-Food, Fibre and Other Ecosystem Products		5-FAQ		FAQ 5.5: Climate change is not the only factor threatening global food security: other than climate action, what other actions are needed to end hunger and ensure access by all people to nutritious and sufficient food all year round?	837	For food consumers, we could consider shifts to different diets that are healthier and make more efficient use of natural resources; depending on context, these could involve rebalancing consumption of meat and highly processed foods, reducing food loss and waste, and preparing food in more energy-efficient ways. Policymakers can enable such actions through appropriate price and trade policies, i…			Food production/systems	Nutrition	Gender		Yes
	1								1	0	1		3	9		09-Buildings	9.8	Links to sustainable development	table 9.4 Aspects of mitigation actions in buildings and their contributions to the 2030 Sustainable 2 Development Goal	1000	SDG16: 6 Building retrofits are associated with lower crime. Improved access to electric lighting can improve safety 7 (particularly for women and children). Institutions that are effective, accountable and transparent are needed at all 8 levels of government for providing energy access and promoting modern renewables as well as boosting 9 sufficiency and efficiency			Built environment	Violence & CP	Gender
	1								1	0	1		3	5		05-Demand, Services and Social Aspects of Mitigation	5.6	5.6 Governance and Policies	5.6.4 Policy sequencing and packaging to strengthen enabling conditions	569	The uptake of decentralised energy services using solar PV in rural areas in 20 developing countries is one such example where successful initiatives are linked to the convergence of 21 multiple policies that include import tariffs, research incentives for R&D, job creation programmes, 22 policies to widen health and education services and strategies for increased safety for women and 23 children…			Built environment	Violence & CP	Gender
	1								1	0	1		2	7	07-Health, Wellbeing and the Changing Structure of Communities		7.1		Box 7.1	1055	More studies with a gender perspective on climate change as a determinant of Indigenous Peoples’ health are needed, along with the perspectives of indigenous children and youth, displaced individuals and communities in urban settings (Kowalczewski and Klein, 2018).			Governance and planning	Voice and political engagement	Gender	Participation	Yes
	1								1	0	1		2	11	11-Australasia		11.4	11.4 Indigenous Peoples		1629	Due to ongoing impacts of colonisation, Aboriginal and Torres Strait Islander Peoples have, on average, lower income, poorer nutrition, lower school outcomes and employment opportunities, higher incarceration and higher levels of removal of children than non-Indigenous Australians, represented in high comorbidities of chronic diseases and mental health impacts (Marmot, 2011; Green and Minchin, 20…	Violence & CP	Physical health			Inequality	Coloniality
				1					0	1		1	2	5	05-Food, Fibre and Other Ecosystem Products		5.13		Box 5.13: Supporting Youth Adaptation in Food Systems	820	Box 5.13: Supporting Youth Adaptation in Food Systems Young people are key agents in agrifood systems: both a vulnerable group, and one that can foster systemic change (high confidence) (Brooks et al., 2019; Figure X; IFAD, 2019; Flynn and Sumberg, 2021; HLPE, 2021). Food systems are the largest source of employment for young people, but do not always provide adequate livelihoods or decent workin…	Livelihoods	Migration			Inequality	Gender
	1	1		1					2	1	1	1	2	8	08-Poverty, Livelihoods and Sustainable Development		8.3		8.3.4.2 Economic (e.g., Income, Assets) Impacts of Climate Change and Vulnerability	1207	Geographical focus on non-economic losses in the literature is largely on the Global South, with studies mainly smaller in scale (high agreement). Many events studied include severe storms, floods and landslides. Key groups affected include low-income groups, agro-pastoralists, women and girls, children and youth, Indigenous Peoples, ethnic and religious minorities. In Europe, the Samis face sign…	Mortality				Inequality	Gender	Yes
		1							1	0	1		2	5	05-Food, Fibre and Other Ecosystem Products		5.12		5.12 Food Security, Consumption and Nutrition // 5.12.1 Introduction	793	TABLE CIDs and mechanisms for food security impacts: Increase in number and intensity of extreme weather events (e.g., droughts, floods) lead to increased food prices, which often leads to lower dietary diversity as well as lower consumption levels. Group most affected: Low-income consumers. Women and girls. Refs: FAO et al. (2018), Mbow et al. (2019), Ilboudo Nébié et al. (2021)	Nutrition				Inequality	Gender	Yes
		1							1	0	1		2	5	05-Food, Fibre and Other Ecosystem Products		5.12		Table 5.14 | Impacts from climate change drivers on the four dimensions of food security. Adapted from Table 5.1 in SRCCL	793	Climate change extreme events make fruits and vegetables relatively unaffordable compared with less-nutrient-dense foods. Countries dependent on food imports, e.g., Small Island Developing States. Poor households living in flash flood and saline zones in Bangladesh who rely on monocropped rice. Women and children may experience greater impacts from extreme events.	Nutrition				Inequality	Gender
		1							1	0	1		2	5	05-Food, Fibre and Other Ecosystem Products		5.12		Table 5.14 | Impacts from climate change drivers on the four dimensions of food security. Adapted from Table 5.1 in SRCCL	793	Increase in number and intensity of extreme weather events (e.g., droughts, floods) lead to increased food prices, which often leads to lower dietary diversity as well as lower consumption levels Low-income consumers. Women and girls.	Nutrition				Inequality	Gender
	1								1	0	1		2	16	16-Key Risks across Sectors and Regions		16.3	Synthesis of Observed AdaptationRelated Responses	table 16.2 | Observed examples of maladaptation and co-benefits from adaptation-related responses in human systems.	2439	Expansion of informal settlements in cities (Solomon Islands); relocation to areas prone to landslide and soil erosion or insufficient housing (Fiji); disproportionate burden on vulnerable communities (China); temporary relocation created gender inequality associated with minimal privacy; poor access to private toilets; sexual harassment; reduced sleep; insufficient or food rationing; exploitatio…	Violence & CP				Inequality	Gender
	1	1							2	0	1		2	4	04-Water		4.4		Box 4.4 | COVID-19 Amplifies Challenges for WaSH Adaptation	628	Compound disasters have arisen due to either the co-occurrence of drought, storms or floods and COVID-19. COVID-19 acts as a stress multiplier for women and girls in charge of water collection and minorities and disabled people who are not engaged in water management (Phillips et al., 2020; Rodriguez-Lonebear et al., 2020). Across the world, existing inequalities deepened due to lockdowns, which …	WASH	Education and play			Inequality	Gender
				1					0	1		1	2	11	11-Australasia		11.1	11.1.2 Economic, Demographic and Social Trends			Climate change inaction exacerbates intergenerational inequity, including prospects for the current younger population (Hayward, 2012). Increasing transient worker populations (ABS, 2018) may diminish social networks and adaptive capacity (Jiang et al., 2017). The region has an ageing population and increasing numbers of people living on their own who are highly vulnerable to extreme events, incl…	General burden				Inequality	Intergenerational justice
	1			1					1	1	1	1	2	12	12-Central and South America		12.5	Adaption	12.5.7 Poverty, Livelihood and Sustainable Development	1746	Inequality is growing, a CSA structural characteristic; the Gini index average for Latin American countries (including Mexico) decreased to 0.466 in 2017, where 1% of the richest got 22 times more income than 10% of the poorest (ECLAC, 2019b; Busso and Messina, 2020), but in 2018, 29.6% of Latin American populations were poor (which increased to 182 million) and 10.2% were living in extreme pover…	Livelihoods				Inequality	Intersectionality	Yes
	1								1	0	1		3	15		15-Investment and Finance	15.6	Approaches to accelerate alignment of financial flows with long-term 41 global goals	15.6.7 Development of local capital market	1603	De-risking tools to lower capital costs and mobilise diverse investors. Paris aligned NDCs that 2 integrate policies on COVID-19 pandemic recovery, climate action, sustainable development, just 3 transition and equity can harness co-benefits including contribution to “Invisible UN SDG 7 energy 4 poverty sectors” (high confidence). Developing countries require access to affordable finance for 5 pr…	Livelihoods				Inequality	Justice
	1								1	0	1		2	4	04-Water		4.8		4.8.3 Gender, Equity and Social Justice	657	In summary, there is high confidence that the effects of climate change-induced water insecurity are not evenly felt across populations. Particularly vulnerable groups are women, children, disabled and Indigenous Peoples whose ability to access adequate water is limited and varies across race, ethnicity and caste. Equity and justice are central to climate change adaptation and sustainable develop…	WASH				Inequality	Justice	Yes
	1								1	0	1		2	8	08-Poverty, Livelihoods and Sustainable Development		8.3		8.3.2.1 Hotspots and Spatial Patterns of Multidimensional Vulnerability	1197	While climate change differentially impacts people in vulnerable situations within countries, including the poor, children, women, marginalised Indigenous or other ethnic minority people (Rhiney et al., 2016; Méndez et al., 2020), the global assessment results underscore that, in most vulnerable regions and countries, very limited resources and structures exist to support these groups when drough…	General burden				Inequality	Vulnerability	Yes
	1								1	0	1		2	6	06-Cities Settlements and Key Infrastructure		6.2		6.2.1 Risk Creation in Cities, Settlements and Infrastructure	922	The data assessed in this section are limited by uneven coverage. Despite improvements since AR5, data continue to be more complete for extreme events than for chronic hazards and everyday risks, which may have high aggregate impacts and disproportionately erode the well-being of urban poor households, especially for the most vulnerable, including women, children, the aged, disabled and homeless …	General burden				Inequality	Vulnerability	Yes
				1					0	1		1	2	13	13-Europe			How can climate change affect social inequality in Europe?	Frequently Asked Question	1889	Social inequalities in Europe arise from disparities in income, gender, ethnicity, age as well as other social categorisations. In the EU, about 20% of the population (109 million people) live under conditions of poverty or social exclusion. Moreover, poverty is unequally distributed across Europe, with higher poverty levels in EEU. The oldest and youngest in society are often most vulnerable	Livelihoods				Inequality	Vulnerability
	1								1	0	1		2	8	08-Poverty, Livelihoods and Sustainable Development		8.3		8.3.4.1 Economic (e.g., Income, Assets) Impacts of Climate Change and Vulnerability	1205	There is robust evidence that many African countries experience climate-related losses in terms of loss of crop yields, destroyed homes, food insecurity through increased food prices, and displacement ... Attention has been focused on low-income groups, women and children, poor rural communities, and Indigenous Peoples such as the example of the Dupong, an Indigenous Peoples in Ghana using Indige…	Livelihoods	WASH			Inequality	Vulnerability	Yes
	1								1	0	1		2	9	09-Africa		9.1		9.10.2.4 Impacts of Extreme Weather	1378	Flooding and landslides are common after extreme rainfall and are the most frequently described impact of climate variability in Africa’s cities currently, with residents of poorly serviced or informal settlements most vulnerable (Hunter et al., 2020). Post-traumatic stress disorders in affected individuals are common, including in children (Rother, 2020).	Mental health				Inequality	Vulnerability
	1								1	0	1		2	16	16-Key Risks across Sectors and Regions		16.5	Key Risks Across Sectors and Regions	16.5.2.3.5 Risk to human health (RKR-E)	2462	iii) Climate change would lead to severe risks of morbidity and mortality caused by waterborne diseases, particularly for diarrhoea in children in many lower- and middle-income countries (LMICs) and where vulnerability remains high (medium confidence). The global CMR for diarrhoea is 1.98 for all ages, but varies by region and age group, reaching as high as 53 for <1-year-olds in Africa (IHME, 20…	Mortality	WASH			Inequality	Vulnerability
	1								1	0	1		2	9	09-Africa		9.8		9.8.1 Vulnerability to Observed and Projected Impacts from Climate Change	1350	Children and pregnant women experience disproportionately greater adverse health and nutrition impacts (very high confidence) (Gebremeskel Haile et al., 2019; see Chapter 7 Section 7.2.4).	Nutrition	Physical health			Inequality	Vulnerability
	1								1	0	1		2	5	05-Food, Fibre and Other Ecosystem Products		5.12		5.12.4.1 Food availability and access	798	Box 5.10: Food Safety Interactions with Food Security and Malnutrition Climate change significantly increases the future food safety risks (high confidence) (Sections 5.8.2, 5.8.3, 5.11.1, Box 5.9). Increasing temperatures and drought stress are expected to lead to greater aflatoxin contamination of food crops. Aflatoxins, a major foodborne hazard, contaminate staple crops and are associated with…	Nutrition	Physical health			Inequality	Vulnerability
				1					0	1		1	3	9		09-Buildings	9.8		9.8.2.2 Energy/fuel poverty, indoor environmental quality and health	1001	Living in fuel poverty, and particularly in cold and damp housing is related to excess winter mortality and increased morbidity rates due to respiratory and cardiovascular diseases, arthritic and rheumatic illnesses, asthma, etc. (Camprubí et al. 2016; Wilson et al. 2016; Lacroix and Chaton 2015; Ormandy and Ezratty 2016; Payne et al. 2015; Thema et al. 2017). In addition, lack of affordable warm…	Physical health				Inequality	Vulnerability	Yes
	1								1	0	1		2	9	09-Africa		9.1		9.10.2 Observed Impacts and Projected Risks	1372	Climate change is already impacting certain health outcomes in Africa (e.g. temperature-related mortality) and risks for most (but not all) health outcomes are projected to increase with increasing global warming (Figure 9.32), with young children (<5 years old), the elderly (>65 years old), pregnant women, individuals with pre-existing morbidities, physical labourers and people living in poverty…	Physical health				Inequality	Vulnerability	Yes
	1								1	0	1		2	4	04-Water			Executive Summary	Executive Summary	555	Changes in water-related hazards disproportionately impact vulnerable populations such as the poor, women, children, Indigenous Peoples and the elderly in all locations, especially in the Global South, due to systemic inequities stemming from historical, socioeconomic and political marginalisation (medium confidence). {4.3.1, 4.3.3, 4.3.4, 4.3.8}	WASH	Physical health			Inequality	Vulnerability	Yes
	1								1	0	1		2	10	10-Asia		10.3	Regional and Sub-regional Characteristics	10.3.3 Demographics and Socioeconomic Characteristics	1468	As poor households are constrained in their ability to receive nutrition, schooling and health care for their children, this is greatly dampening progress in human capital development and productivity growth, both of which are critical imperatives for sustainable development (Carleton and Hsiang, 2016; Schlenker and Auffhammer, 2018)	Education and play	Nutrition			Inequality
	1								1	0	1		2	16	16-Key Risks across Sectors and Regions		16.6	Reason for Concern across scales	16.6.1.2 Results, Implications and Gaps	2479	The current SDG 13 (climate action) targets also do not specifically track the possibility of differential impacts on society from disasters and extreme weather events (RFC2). For example, the first indicator (Section 13.1.1.1), ‘Number of deaths, missing persons and directly affected persons attributed to disasters per 100,000 population’, does not include any requirement for disaggregated data,…	General burden				Inequality		Yes
				1					0	1		1	2	8	08-Poverty, Livelihoods and Sustainable Development		8.2		8.2.2.2 Observed Impacts and Implications for Structural Inequalities, Gender and Access to Resources	1191	This section examines the mutual reinforcement of climate change impacts and structural inequalities. There is robust evidence that negative impacts and harm posed by climate change are also a result of social and political processes and existing structural inequalities (Sealey-Huggins, 2018). Climate change encompasses unevenly distributed impacts on women, youth, elderly, Indigenous Peoples, co…	General burden				Inequality		Yes
	1								1	0	1		2	4	04-Water		5.13	Cross-Chapter Box DISASTER | Disasters as the Public Face of Climate Change	Cross-Chapter Box DISASTER	591	Disasters expose inequalities in natural and managed systems and human systems as they disproportionately affect poor and marginalised communities like ethnic minorities, people of colour, Indigenous Peoples, women and children.	General burden				Inequality		Yes
				1					0	1		1	3	16		16-Innovation, Technology Development and Transfer	16.2		16.6.2 Sustainable development and technological innovation: Synergies, trade-offs and 14 governance	1695	Innovation and climate mitigation policies can also have negative socio-economic impacts and not all countries, actors and regions around the world benefit equally from rapid technological change (UNCTAD 2019; Eisenberg 2019; McCauley and Heffron 2018; Henry et al. 2020b; Deng et al. 2018a). 11 In fact, socio-technical transitions often create winners and losers (Roberts et al. 2018). Technologic…	Livelihoods	Education and play			Inequality
	1						1		1	1	1	1	2	SPM	00-Summary for Policymakers			Mid to Long-term Risks (2041–2100)		15	Mental health challenges, including anxiety and stress, are expected to increase under further global warming in all assessed regions, particularly for children, adolescents, elderly, and those with underlying health conditions (very high confidence)	Mental health				Inequality		Yes
	1								1	0	1		2	10	10-Asia		10.3	Regional and Sub-regional Characteristics	10.3.3 Demographics and Socioeconomic Characteristics	1468	Children, already susceptible to age-related insecurities, face additional destabilising insecurities from questions about how they will cope with future climate change (Hansen et al., 2	Mental health				Inequality
				1					0	1		1	2	9	09-Africa		9.1		9.10.2.6.1 Mental health and well-being	1379	Extreme weather events are often severely detrimental to mental health (Scheerens et al., 2020), with elevated rates of anxiety, post-traumatic stress disorder and depression in impacted individuals (Schlenker and Lobell, 2010; Nuvey et al., 2020). Youths may be at especially high risk (Barkin et al., 2021).	Mental health				Inequality
	1								1	0	1		2	9	09-Africa		9.3		9.3.2 Adaptation Co-Benefits and Trade-Offs with Mitigation and SDGs	1304	When farmers migrate, it puts pressure on inadequate social services provision and facilities at their destination (SDG 8) and leads to reduced farm labour and a deterioration of the workforce and assets (SDG 2) (Gemenne and Blocher, 2017a), which negatively affects farm operations and non-migrants, particularly women, elderly and children, at the point of origin (Nyantakyi-Frimpong and Bezner-Ke…	Migration	General burden			Inequality		Yes
	1								1	0	1		2	16	16-Key Risks across Sectors and Regions		16.5	Key Risks Across Sectors and Regions	16.5.2.3.7 Risk to water security (RKR-G	2464	With approximately 50 million people per year currently affected by flooding (Alfieri et al., 2017), we define severe outcomes as more than 100 million people affected by flooding. At 2°C global warming, between approximately 50 million and 150 million people are projected to be affected by flooding, with figures rising to 110 million to 330 million at 4°C global warming. These projections assume…	Mortality	WASH			Inequality
	1								1	0	1		2	9	09-Africa		9.1		9.10.2.2.1 Diarrhoeal diseases Observed impacts	1373	Climate change is projected to cause 20,000–30,000 additional diarrhoeal deaths in children (<15 years old) by mid-century under 1.5°C–2.1°C global warming (WHO, 2014), with west Africa most affected, followed by east, central and southern Africa. Cholera outbreaks are anticipated to impact east Africa most severely during and particularly after ENSO events (Moore et al., 2017b).	Mortality	Physical health			Inequality
	1								1	0	1		2	7	07-Health, Wellbeing and the Changing Structure of Communities		7.3		7.3.1.1 Global Impacts	1090	The study estimated that the climate change projected to occur by 2050 (compared to 1961–1990) could result in an excess of approximately 250,000 deaths yr–1, dominated by increases in deaths due to heat (94,000, mainly in Asia and high-income countries), childhood undernutrition (85,000, mainly in Africa but also in Asia), malaria (33,000, mainly in Africa) and diarrhoeal disease (33,000, mainly…	Mortality	Nutrition			Inequality
	1								1	0	1		2	7	07-Health, Wellbeing and the Changing Structure of Communities		7.3	7.3 Projected Future Risks under Climate Change	7.3.1.4 Projected Impacts on Waterborne Diseases	1095	WHO Quantitative Risk Assessments for the effects of climate change on selected causes of death for the 2030s and 2050s project that overall deaths from diarrhoea should fall due to socioeconomic development but that the effect of climate change under higher emission scenarios could cause an additional 48,000 deaths in children aged under 15 years in 2030 and 33,000 deaths for 2050, particularly …	Mortality	Physical health			Inequality
	1								1	0	1		2	16	16-Key Risks across Sectors and Regions		16.6	Reason for Concern across scales	16.6.3.3 Distribution of Impacts (RFC3)	2491	AR6 continues to highlight the uneven regional distribution of projected climate change risks. Biodiversity loss is projected to affect a greater number of regions with increasing warming, and to be highest in northern South America, southern Africa, most of Australia, and northern high latitudes (Section 2.5.1.3, medium confidence). Climate change is projected to increase the number of people at…	Nutrition	Mortality			Inequality
	1								1	0	1		2	16	16-Key Risks across Sectors and Regions		16.2	Synthesis of observed impacts of changes in climate related systems	16.2.3.3 Coastal systems	2426	Due to complex interactions with socioeconomic conditions, climate induced trends in crop yields and production do not directly transmit to crop prices, availability of food, or nutrition status. This complexity, in addition to the limited availability of long-term data, has so far impeded the detection and attribution of a long-term impact of climate change on associated food security indicators…	Nutrition	Physical health			Inequality
	1								1	0	1		2	14	14-North America		14.6	14.6 Key Risks	14.6.2 Key Risks Across Sectors in North America	1984	Cascading and interacting impacts of climate change threatens food systems as well as food and nutritional security for many North Americans, especially those already experiencing food and nutritional scarcity, women and children with high nutritional needs and Indigenous Peoples reliant on subsistence resources (high confidence) (Section 14.5.6)	Nutrition				Inequality		Yes
	1								1	0	1		3	12		12-Cross sectoral Perspectives	12.4	Food systems	12.4.1 Introduction	1279	Though total production of calories is sufficient for the world population (Wood et al. 2018; 30 Benton et al. 2019), availability and access to food is unequally distributed, and there is a lack 31 of nutrient-dense foods, fruit and vegetables (Berners-Lee et al. 2018; Kc et al. 2018). In 2019, 32 close to 750 million people were food insecure. An estimated 2 billion people lacked adequate 33 ac…	Nutrition	Physical health			Inequality
	1								1	0	1		2	10	10-Asia		10.3	Regional and Sub-regional Characteristics	10.3.3 Demographics and Socioeconomic Characteristics	1468	Such populations may be more susceptible to disease, have pre-existing health conditions or live in areas that do not promote good health or well-being; for instance, loss of income and food supply shortages could lead children in rural households to nutritional deprivations that can have both immediate and lifelong impacts (Gleick, 2014; UNICEF, 2015)	Nutrition	Physical health			Inequality
	1								1	0	1		2	9	09-Africa		9.8		9.8.1 Vulnerability to Observed and Projected Impacts from Climate Change	1350	Global climate impacts on food availability are expected to lead to higher food prices, increasing the risk of hunger for people in African countries, and slowing progress towards eradicating child undernutrition and malnutrition in all its forms (see Chapter 7 Section 7.4).	Nutrition				Inequality
	1								1	0	1		2	9	09-Africa		9.1		9.10.2.6 Non-communicable Diseases and Mental Health	1379	Paradoxically, despite growing levels of undernutrition, the incidence of overweight and obesity continues to rise in Africa, particularly in children under 5 years from the northern and southern parts of the continent (FAO and ECA, 2018).	Nutrition				Inequality
	1								1	0	1		2	7	07-Health, Wellbeing and the Changing Structure of Communities		7.2		7.2.4.4 Observed Impacts on Malnutrition	1075	Nearly half of all deaths in children under five years of age are attributable to undernutrition, putting children at greater risk of dying from common infections. Undernutrition in the first 1,000 days of a child’s life can lead to stunted growth, which can result in impaired cognitive ability and reduced future school and work performance and the associated costs of stunting in terms of lost ec…	Nutrition	Mortality			Inequality
	1								1	0	1		2	7	07-Health, Wellbeing and the Changing Structure of Communities		7-Exec summary		7-Exec summary	1045	Children and pregnant women experience disproportionately greater adverse nutrition and health impacts (high confidence). Climatic influences on nutrition are strongly mediated by socioeconomic factors (very high confidence) {7.2.4.4, 7.3.1}.	Nutrition	Physical health			Inequality
	1								1	0	1		2	7	07-Health, Wellbeing and the Changing Structure of Communities		7-Exec summary		7-Exec summary	1045	Increasing atmospheric concentrations of carbon dioxide and climate change are projected to increase diet-related risk factors and related non-communicable diseasess globally and increase undernutrition, stunting and related childhood mortality particularly in Africa and Asia, with outcomes depending on the extent of mitigation and adaptation (high confidence). These projected changes are expecte…	Nutrition	Physical health			Inequality
	1								1	0	1		2	7	07-Health, Wellbeing and the Changing Structure of Communities		7.1		Box 7.1	1055	Undernutrition and metabolic disturbances associated with overnutrition and obesity due to the decreased availability or safety of local and traditional foods and increased dependency on imported substitutes affect many Indigenous Peoples worldwide (Amstislavski et al., 2013; Zavaleta et al., 2018; Houde et al., 2020; Jones et al., 2020; Akande et al., 2021; Bogdanova et al., 2021; Bryson et al.,…	Nutrition	Physical health			Inequality
	1								1	0	1		2	7	07-Health, Wellbeing and the Changing Structure of Communities		7.3		7.3.1.9.1 Malnutrition	1097	Climate change is projected to exacerbate malnutrition (high confidence). Moderate and severe stunting in children less than five years of age was projected for 2030 across 44 countries to be an additional 570,000 cases under a prosperity and low climate change scenario (RCP2.6) to one million cases under a poverty and high climate change scenario (RCP8.5), with the highest effects in rural areas…	Nutrition	Physical health			Inequality
	1								1	0	1		2	7	07-Health, Wellbeing and the Changing Structure of Communities		7.3		7.3.1.9.1 Malnutrition	1097	The projected risks of hunger and childhood underweight vary under the five SSPs, with population growth, improvement in the equality of food distribution and income-related increases in food consumption influencing future risks (Ishida et al., 2014; Hasegawa et al., 2015). A review of 57 studies projecting global food security to 2050 under the SSPs concluded that global food demand was expected…	Nutrition	Physical health			Inequality
	1								1	0	1		2	5	05-Food, Fibre and Other Ecosystem Products		5.12	Food Security, Consumption and Nutrition		794	Children in Sub-Saharan Africa are particularly at risk of undernutrition and mortality from increasing temperatures (Belesova et al., 2019; Baker and Anttila-Hughes, 2020). An additional estimated 5.9 million children became underweight because of rising temperatures in 51 countries affected by ENSO intensity in 2015–2016	Nutrition	Mortality			Inequality
	1								1	0	1		2	5	05-Food, Fibre and Other Ecosystem Products		5.12	Food Security, Consumption and Nutrition		796	Rural children in low-income countries are at particular risk of undernutrition from climate change impacts, due to a combination of factors: potential reduction in food quantity and quality from heat impacts; greater exposure from outdoor play and agricultural activities; and increased likelihood of heat exhaustion and vectorborne and diarrheal diseases (Oppenheimer and Anttila-Hughes, 2016).	Nutrition	Physical health			Inequality
	1								1	0	1		2	5	05-Food, Fibre and Other Ecosystem Products		5.12		Table 5.14 | Impacts from climate change drivers on the four dimensions of food security. Adapted from Table 5.1 in SRCCL	793	TABLE -- Extreme events (e.g., floods) disrupt food storage and transport networks, reducing access and availability of food supplies. Countries dependent on food imports, e.g., Small Island Developing States. Poor households living in flash flood and saline zones in Bangladesh who rely on monocropped rice. Women and children may experience greater impacts from extreme events. Toufique and Belton…	Nutrition				Inequality
	1								1	0	1		2	16	16-Key Risks across Sectors and Regions		16.5	Key Risks Across Sectors and Regions	16.5.2.3.5 Risk to human health (RKR-E)	2462	Climate change threatens the progress that has been made towards reducing the burden of diarrhoea. For example, in Sub-Saharan Africa, while overall diarrhoea rates are expected to continue to decline (GBD 2016 Diarrhoeal Disease Collaborators, 2018), warming in 2030 (relative to the late 20th century) is projected to lead to diarrhoeal deaths in children under 15 equivalent to a CMR increase of …	Physical health	WASH			Inequality
	1								1	0	1		2	14	14-North America		14.5	Observed Impacts, Projected Risks and Adaptation by Sector	14.5.6 Health and Well-being /14.5.6.5 Water-Borne Disease	1970	In North America, stormwater and water treatment infrastructure play important roles in reducing water-borne disease risk during precipitation events (high confidence). In the USA, heavy precipitation events are associated with higher rates of childhood gastrointestinal illness in municipalities with untreated drinking water, but not in municipalities with treated drinking water (Uejio et al., 20…	Physical health	WASH			Inequality
	1								1	0	1		2	13	13-Europe		13.7	Health, Well-Being and the Changing Structure of Communities	Observed Impacts and Projected Risks	1860	Other extreme events already result in major health risks across Europe. Between 2000 and 2014, for example, floods in Russia killed approximately 420 people, mainly older women (Belyakova et al., 2018). Fatalities associated with coastal and riverine flooding (Section 13.2.2), wildfires (Section 13.3.4) and windstorms could rise substantially by 2100 (Forzieri et al., 2017; Feyen et al., 2020). …	Physical health				Inequality
	1								1	0	1		2	13	13-Europe				Frequently Asked Question	1891	Heatwaves affect people in different ways; risks are higher for the elderly, pregnant women, small children, people with pre-existing health conditions and low-income groups. By 2050, about half of the European population may be exposed to high or very high risk of heat stress during summer, particularly in SEU and increasingly in EEU and WCE. The severity of heat-related risks will be highest in…	Physical health				Inequality		Yes
	1								1	0	1		2	12	12-Central and South America		12.3	Hazards, Exposure, Vulnerabilities and Impacts	12.3.3 Northern South America Sub-region	1705	Table 12.1 shows the changes observed in reproduction potential for dengue in the different subregions due to changes in rainfall and temperature. Forest fires pose a major threat to public health in the region because they relate to an increase in hospital admissions due to respiratory problems, mainly among children and the elderly (Figure 12.5). The amount of air pollutants detected is sometim…	Physical health				Inequality
	1								1	0	1		2	10	10-Asia		10.4	Key Systems and Associated Impacts, Adaptation and Vulnerabilities	0.4.7 Health and Well-Being	1509	South and Southeast Asia are projected to be among the highest-risk regions for reduced dietary iron intake among women of childbearing age and children under five years due to elevated CO2 concentrations (medium confidence) (Smith and Myers, 2018)	Physical health	Nutrition			Inequality
	1								1	0	1		2	9	09-Africa		9.1		9.10.2.2.1 Diarrhoeal diseases Observed impacts	1373	Africa has the highest rates of death due to diarrhoeal diseases in the world (Havelaar et al., 2015; Troeger et al., 2018) and many children have repeated diarrhoeal episodes with impaired growth, stunting, immune dysfunction and reduced cognitive performance (Squire and Ryan, 2017). High land and sea temperatures (Paz, 2009; Musengimana et al., 2016) and precipitation extremes increase transmis…	Physical health	Mortality			Inequality
	1								1	0	1		2	9	09-Africa		9.5		9.5.2.1.2 Projections	1323	Children born in 2020, under a 1.5°C-compatible scenario will be exposed to 4–6 times more heatwaves in their lifetimes compared to people born in 1960; this exposure increases to 9–10 times more heatwaves for emission reduction pledges, limiting global warming to 2.4°C (Thiery et al., 2021).	Physical health				Inequality
	1								1	0	1		2	9	09-Africa		9.5		9.5.4.2 Projections	1326	Children born in 2020, under a 1.5°C-compatible scenario will be exposed to 6–8 times more heatwaves in their lifetimes compared to people born in 1960; this exposure increases to 7–9 times more heatwaves at GWL 2.4°C (Thiery et al., 2021). The number of potentially lethal heat days per year is projected to increase from <50 during 1995–2005 to 50–75 at GWL 1.6°C, 100–150 at GWL 2.5°C and 200–350…	Physical health				Inequality
	1								1	0	1		2	9	09-Africa		9.5		9.5.6.1.2 Projections	1328	Children born in 2020, under a 1.5°C-compatible scenario will be exposed to 3–4 times more heatwaves in their lifetimes compared to people born in 1960, although in Angola this is 7–8 times; at GWL 2.4°C this exposure increases to 5–9 times more heatwaves (>10 times in Angola) (Thiery et al., 2021).	Physical health				Inequality
	1								1	0	1		2	8	08-Poverty, Livelihoods and Sustainable Development		8.4		Box 8.6 | Social dimensions of the Amazonia forest fires and future risks	1221	In Acre State, the fire incidence coupled with extreme droughts in 2005 and 2010 led to an increase—from 1.2% to 27%—in hospitalisations of children (under 5 years) due to respiratory diseases (Smith et al., 2015). The same evidence was found among the rapidly deforested areas known as the ‘Arc of Deforestation’, with a dramatically higher number of respiratory diseases recorded, mainly in childr…	Physical health				Inequality
	1								1	0	1		2	8	08-Poverty, Livelihoods and Sustainable Development		8.4		Box 8.6 | Social dimensions of the Amazonia forest fires and future risks	1221	The recent fires in the Amazon basin are directly affecting 24 million Amazonians with the worst impacts felt by children and the elderly (Machado-Silva et al., 2020), Indigenous Peoples and traditional communities (Fellows et al., 2020). Children under 5 years old and the elderly in rural areas are respectively 11 and 22 times more affected by the smoke from fire outbreaks and temperature increa…	Physical health				Inequality
	1								1	0	1		2	8	08-Poverty, Livelihoods and Sustainable Development		8.4		8.4.5.6 Future Challenges for Vulnerability and Livelihood Security due to Adaptation Limits of People and Ecosystems	1225	Other evidence shows that the structural poverty and socioeconomic inequalities (Lusseau and Mancini, 2019), disability (Sun et al., 2017), corruption (Markkanen, 2019) and isolation (Reyer et al., 2017) (Table 8.7) compound to amplify climate risks among rural and urban poor, smallholder farms, coastal settlement with health impacts on children’s development (Perera, 2017) and urban elderly (Sun…	Physical health				Inequality
	1								1	0	1		2	7	07-Health, Wellbeing and the Changing Structure of Communities		7.2		7.2.4.2 Injuries Arising from Extreme Weather Events Other than Heat and Cold	1074	Injuries comprise a substantial portion of the global burden of disease. In 2019, injuries comprised 9.82% of total global DALYs and 7.61% of deaths (Vos et al., 2020). The causal pathways for many injuries, particularly those from heat and extreme weather events, flooding and fires, exhibit clear climate sensitivity (Roberts and Arnold, 2007; Roberts and Hillman, 2005), as do some injuries occur…	Physical health				Inequality		Yes
	1								1	0	1		2	6	06-Cities Settlements and Key Infrastructure		6.2		6.2.2 Dynamic Interaction of Urban Systems with Climat	922	Within cities, exposure to heat island effects is uneven, with some populations disproportionately exposed to risk including low income communities, children, the elderly, disabled, and ethnic minorities (Quintana-Talvac et al., 2021; Sabrin et al., 2020; Chambers, 2020; and see later in this section)	Physical health				Inequality		Yes
	1								1	0	1		3	9		09-Buildings	9.8	Links to sustainable development	table 9.4 Aspects of mitigation actions in buildings and their contributions to the 2030 Sustainable 2 Development Goal	1000	SDG 10: Efficient cook-stoves as well as improved access to electricity and clean fuels in developing countries 39 will result in substantial time savings for women and children, thus enhancing education and the development of productive activities. Sufficiency and efficiency measures lead to lower energy expenditures, thus reducing income inequalities. The distributional costs of some mitigation…			Built environment	Education and play	Inequality	Gender
				1					0	1	1		2	9	05-Food, Fibre and Other Ecosystem Products		5		5.14.2.2 Incorporating Indigenous knowledge and local knowledge	819	In some regions, there has been a loss of IK about food systems, reducing adaptive capacity (Richards et al., 2019; Panikkar and Lemmond, 2020). Knowledge exchange between Indigenous elders and youth can support adaptive capacity (Osterhoudt, 2018; Richards et al., 2019; Zin et al., 2019). Education utilising IK and LK can help prevent maladaptation options (high confidence) (Melvin et al., 2017;…			Climate-change education	General benefit	Inequality	Participation
	1								1	0	1		2	6	06-Cities Settlements and Key Infrastructure		6.4		FAQ6.4	995	Climate adaptation planning is most effective when it is sensitive to the diverse ways that low-income and minority communities are more likely to experience climate risk, including women, children, migrants, refugees, internally displaced peoples and racial/ethnic minority groups, among others.			Governance and planning	General benefit	Inequality		Yes
				1					0	1		1	2	4	04-Water		4.8		4.8.6 Polycentric Water Governance	659	In summary, polycentric governance can enable improved water governance and effective climate change adaptation (medium confidence). However, it can also exacerbate existing inequalities as long as less powerful actors, such as women, Indigenous Peoples and young people, are not adequately involved in the decision-making process (high confidence).			Governance and planning	General benefit	Inequality	Participation
	1								1	0	1		2	9	09-Africa		9.1		9.10.2.5 Malnutrition 9.10.2.5.1 Observed impacts	1379	More than 250 million Africans are undernourished, mostly in central and east Africa (FAO et al., 2020), which increases childhood stunting, affects cognition and has trans-generational sequelae (IFPRI, 2016; UNICEF et al., 2019). Undernutrition is strongly linked with hot climates (Hagos et al., 2014; Tusting et al., 2020). In Burkina Faso, low crop yields resulted in around 110 deaths per 10,00…	Mortality	Nutrition			Intergenerational justice
				1					0	1		1	2	10	10-Asia		10.5	Adaptation Implementation	10.5.7 Education and Capacity Development	1525	Effective communication on CCE particularly for younger-generation engagement is also essential, as they are our future leaders as climate change is an inter-generational equity issue (Corner et al., 2015). Action for Climate Empowerment of Article 6 of the UNFCCC target youth as a major group for effective engagement in the formulation and implementation of decisions on climate change (UNFCCC, 2…			Climate-change education	Voice and political engagement	Intergenerational justice	Participation
				1					0	1		1	2	17	17-Decision-Making Options for Managing Risk		17.4	Enabling and Catalysing Conditions for Adaptation and Risk Management	17.4.5.4 Catalysing Agents/Table 17.6 | Examples of types of climate-related litigation	2599	Youth public trust claims; Government inter-generational liability for inadequate climate change mitigation and adaptation efforts. OurChildren’s Trust (a non-profit organisation) and others brought an action against the USA and several executive branch individuals in 2015 claiming damages for their loss of the environment and the defendant’s failure to preserve a habitable climate system by the …			Litigation		Intergenerational justice
	1			1					1	1	1	1	3	14		14-International Cooperation	14.5	Multi-level, multi-actor governance	14.5.3 Civil society and social movements	1508	Prominent examples of new climate social movements that operate transnationally are Extinction 12 Rebellion and Fridays for Future, which collectively held hundreds of coordinated protests across the 13 globe in 2019-2021, marking out ‘the transnational climate justice movement as one of the most 14 extensive social movements on the planet’ (Almeida 2019). Fridays for Future is a children’s and y…			Collective action and social organising		Intergenerational justice	Activism
				1					0	1		1	2	6	06-Cities Settlements and Key Infrastructure		6.1		6.1.5 Changes in the Global Enabling Environment	921	New urban activists and stakeholders, including youth, and Indigenous and minority communities and NGOs alongside business groups have also been visible in the global urban climate debate, pressing for faster, more far-reaching change (Frantzeskaki et al., 2016; O’Brien, Selboe and Hayward, 2018; Alves, Campos and Penha-Lopes, 2019; Smith and Patterson, 2018; Crnogorcevic, 2019; Campos et al., 20…			Collective action and social organising		Intergenerational justice	Activism	Yes
				1					0	1		1	2	1	01-Point of Departure and Key Concepts		1.4		1.4.1.1 Equitable Adaptation Informed by Concepts of Justice	160	The third consideration of distributive justice relevant to climate adaptation is fairness between generations and the obligation to ensure that future generations are guaranteed at least a minimally decent life (Jonas, 1985; Llavador et al., 2010). For example, youth climate activists and political philosophers have argued that today’s children, as well as generations yet unborn, will be exposed…			Collective action and social organising		Intergenerational justice	Activism
	1								1	0	1		2	8	08-Poverty, Livelihoods and Sustainable Development		8.4		8.4.5.3 Future Limits to Adaptation	1217	The loss and degradation of the Amazon forest with global warming temperatures beyond 1.5°C is another clear example of irreversible loss, with significant impact to people’s livelihoods today and in the future (Hoegh-Guldberg et al., 2018; Roy et al., 2018). Moreover, the L&D from climate change impacts are also felt heavily by women, children and elderly given the intersectionality with socioec…	Livelihoods				Intersectionality	Inequality	Yes
	1								1	0	1		2	9	09-Africa		9.1		9.10.1 The Influence of Social Determinants of Health on the Impacts of Climate Change	1372	Nevertheless, there is robust evidence that the health impacts of climate change disproportionately affect the poorest people and children and, in some situations, can differ by gender and age (St Louis and Hess, 2008; Nyahunda et al., 2020; Ragavan et al., 2020; see Box 9.1). Unequal access to health care particularly affects rural communities (Falchetta et al., 2020), vulnerable women and child…	Physical health				Intersectionality	Inequality	Yes
	1								1	0	1		2	18	18-Climate Resilient Development Pathways		Exec Summary		Exec Summary	2657	Social and economic inequities linked to gender, poverty, race/ ethnicity, religion, age or geographic location compound vulnerability to climate change and have created and could further exacerbate injustices, as well as constrain the implementation of CRD for all (very high confidence). Climate change intensifies existing vulnerability and inequality, with adverse impacts of climate change on t…	General burden				Intersectionality	Vulnerability	Yes
				1					0	1		1	2	8	08-Poverty, Livelihoods and Sustainable Development		Exec Summary		Exec Summary	1174	The intersection of inequality and poverty presents significant adaptation limits, resulting in residual risks for people and groups in vulnerable situations, including women, youth, elderly, ethnic and religious minorities, Indigenous People and refugees.	General burden				Intersectionality	Vulnerability	Yes
	1			1					1	1	1	1	2	6	06-Cities Settlements and Key Infrastructure		6.2		6.2.3.1 Urban Poverty and Vulnerability	929	For individuals in urban communities, new literature highlights how differences in vulnerability established by social and economic processes are further differentiated by household and individual variability and intersectionality (Kaijser and Kronsell, 2014; Kuran et al., 2020).This includes differences in wealth and capacity (Romero-Lankao, Gnatz and Sperling, 2016); gender and non-binary gende…	General burden				Intersectionality	Vulnerability	Yes
	1								1	0	1		2	9	09-Africa		9.4		Box 9.1 |Figure Box 9.1.1 | Factors contributing to the progression of vulnerability to climate change in African contexts considering socioeconomic processes, resource access, livelihood changes, and intersectional vulnerability among social groups	1319	Examples of intersectional vulnerability Age-wealth intersection: many children in poor households in urban informal settlements face severe health and educational consequences when flooding halts education and produces acute infectious disease risks (Drivdal 2016). Age-gender-ethnicity intersection: elder women experienced heightened vulnerability	Physical health	Education and play			Intersectionality	Vulnerability
				1					0	1		1	2	1	01-Point of Departure and Key Concepts		1.4		1.4.4.1 Limits to Adaptation and Relation to Transformation	170	This report assesses adaptation limits (soft and hard) and residual risks for some actors and systems (Chapter 16). Residual risk is the risk that remains following adaptation and risk reduction efforts (SROCC). Residual risk is also used as other terms such as ‘residual impacts’, ‘residual loss and damage’ and ‘residual damage’. As noted in AR5 WGII (IPCC, 2014a, b), the residual risk is larger …	General burden				Intersectionality		Yes
		1		1					1	1	1	1	2	9	09-Africa		9.4		9.4.5.3 Climate Change Literacy	1320	More research is needed to examine the intersection of different dimensions of social status on climate change vulnerability in Africa (Thompson-Hall et al., 2016; Oluwatimilehin and Ayanlade, 2021). More analysis of vulnerability based on gender and other social and cultural factors is needed to fully understand the impacts of climate change, the interaction of divergent adaptive strategies, as …			Governance and planning	General benefit	Intersectionality	Vulnerability	Yes
	1								1	0	1		2	18	18-Climate Resilient Development Pathways		18.3	Transitions to Climate Resilient Development	Box 18.5 | The Role of Ecosystems in Climate Resilient Development	2695	Changes in ecosystems leads to changes in ecosystem services including food and limber prevision, air and water quality regulation, biodiversity and habitat conservation, and cultural and mental support (Sections 2.4, 3.5). Table Box 18.5.2 presents examples of climate change’s impact on ecosystems and their services from other chapters in the WGII report. The degradation of ecosystem services is…	General burden				Justice	Inequality	Yes
	1								1	0	1		2	6	06-Cities Settlements and Key Infrastructure		6.3		6.3.6.1 Equity and Justice	958	Distributive justice calls attention to unequal access to urban services, land, capital and technology. Related to this, exposure to health, flooding and drought risks of people living in low-income and informal settlements is a growing concern, as is disaster preparedness and the ability to support the needs of vulnerable groups such as the elderly, children and disabled, where data is often lac…	Physical health				Justice	Vulnerability	Yes
	1								1	0	1		2	18	18-Climate Resilient Development Pathways		18.2	Linking Development and Climate Action	Box 18.2 | Visions of Climate Resilient Development in Kenya	2670	These pressures could make it harder to meet basic health and sanitation goals for rural and poorer urban populations, issues compounded further by likely increases in child malnutrition and diarrheal deaths linked to climate change (WHO, 2016; ASSAR, 2018; Hirpa et al., 2018; Nkemelang et al., 2018; Lesutis, 2020). Development must pay adequate attention to these interconnections to ensure that …	Nutrition	Mortality			Justice
				1					0	1		1	2	SPM	00-Summary for Policymakers			Enabling Climate Resilient Development		29	"Climate resilient development is enabled when governments, civil society and the private sector make inclusive development choices that prioritise risk reduction, equity and justice, and when decision-making processes, finance and actions are integrated across governance levels, sectors and timeframes (very high confidence). Climate resilient development is facilitated by international cooperati…			Governance and planning	Voice and political engagement	Justice	Participation	Yes
				1					0	1		1	3	14		14-International Cooperation	14.5		14.5.3 Civil society and social movem	1508	Historically, the issue of climate change did not give rise to intense, organised transnational protest characteristic of social movements (McAdam 2017). During the 1990s and early 2000s, the activities 40 of the global climate movement were concentrated in developed countries and largely sought to exercise 41 influence through participation in UNFCCC COPs and side events (Almeida 2019). The mid-…			Collective action and social organising		Justice	Activism	Yes
				1					0	1		1	3	14		14-International Cooperation			14.5.3 Civil society and social movement	1509	Transnational civil society organisations advocating for climate justice in global governance have articulated policy positions around rights protections, responsibility-based approaches to climate finance, and the need for transparency and accountability (Derman 2014). Another recent area of activity, which overlaps with that of emerging investor alliances (discussed further in Section 14.5.4), …			Collective action and social organising		Justice	Activism
	1								1	0	1		3	13		13-National and Sub-national Policies and Institutions	13.4	Actors shaping climate governance	13.4.2. Shaping climate governance through litigation	1376	Moreover, there are a number of regulatory challenges to state authorisation of high-emitting projects, which 4 differs from systemic cases against states (Bouwer 2018; Hughes 2019a). For instance, the High Court in 5 Pretoria, South Africa, concluded that climate change is a relevant consideration for approving coal-fired 6 power plants (Humby 2018). Similarly, the Federal Court of Australia con…			Litigation		Justice
	1								1	0	1		2	6	06-Cities Settlements and Key Infrastructure		6.4		6.4.3.5 Addresses Inequalities through Intersectional Perspectives	973	People traditionally excluded from climate change governance, such as children, are also more likely to have their needs and priorities considered in urban planning for adaptation where there are national advocacy bodies, for example, Commissions for Future, or Children’s commissions (Nordström and Wales, 2019; Watts et al., 2019; Hayward, 2021).			Governance and planning	General benefit	Participation
	1								1	0	1		2	9	09-Africa		9.1		9.10.3.2 Community Engagement	1382	Similarly, participation in community organisations improved child nutrition in vulnerable rural households in Eswatini (Anchang et al., 2019). Interventions specifically targeting women are beneficial for food security, although they may be undermined by harmful gender norms in communities that are patriarchal, led by chiefs or have high rates of gender-based violence (Jaka and Shava, 2018; Kita…			Governance and planning	Nutrition	Participation	Vulnerability
				1					0	1		1	2	5	05-Food, Fibre and Other Ecosystem Products				Exec Summary	719	Harnessing youth innovation and vision alongside other SDGs such as gender equity, Indigenous knowledge, local knowledge, and urban and rural livelihoods, will support effective climate change adaptation to ensure resilient economies in food systems (high confidence).			Governance and planning	Nutrition	Participation	Gender
				1					0	1		1	3	SPM		00-Summary for Policymakers				46	The extent to which civil society actors, political actors, businesses, youth, labour, media, Indigenous Peoples, and local communities are engaged influences political support for climate change mitigation and eventual policy outcomes. Structural factors of national circumstances and capabilities (e.g., economic and natural endowments, political systems and cultural factors and gender considerat…			Governance and planning	Voice and political engagement	Participation	Inequality	Yes
				1					0	1		1	2	15	15-Small Islands		15.6	Enablers, Limits and Barriers to Adaptation	15.6.4 Education and Awareness-Raising	2090	More interactive community engagement strategies could include ‘participatory three-dimensional modelling (P3DM), participatory video, development of photo journals, and civil society plans’ (Beckford, 2018, p. 46) that enables broader engagement. In Fiji, Laje Rotuma youth ecocamps have been used to engage younger Fijians to understand adaptation and increasing environmental stewardship with goo…			Climate-change education	Voice and political engagement	Participation
				1					0	1		1	2	9	09-Africa		9.1		9.10.3.2 Community Engagement	1382	Improving ‘climate literacy’ could empower youth, women and men to be active citizens in promoting adherence of governments to international agreements in climate change (Mudombi et al., 2017; Chersich et al., 2019a).			Climate-change education	Voice and political engagement	Participation		Yes
	1			1					1	1	1	1	2	6	06-Cities Settlements and Key Infrastructure		6.3		6.3.3.5 Education and Communication	946	Youth, adult communities, social media and the commercial media can have a significant impact on advancing climate awareness and the legitimacy of adaptive action, particularly in large urban areas (medium evidence, high agreement). Climate change education in urban settlements has increasingly focused on enhancing children and young people’s political agency in schools, universities, and in form…			Climate-change education	Voice and political engagement	Participation
	1			1					1	1	1	1	2	6	06-Cities Settlements and Key Infrastructure		6-FAQ		FAQ6.5	996	Moreover, adaptation efforts may impact people’s lives in very different ways. Policy tools, strategies and financial arrangements for adaptation can include all society sectors and address socioeconomic inequalities. Planning and decision making must respond to marginalised voices and future generations (including children and youth).			Governance and planning	Voice and political engagement	Participation	Intergenerational justice	Yes
				1					0	1		1	3	SPM		00-Summary for Policymakers				4	Increasing diversity of actors and approaches to mitigation. Recent literature highlights the growing role of non-state and sub-national actors including cities, businesses, Indigenous Peoples, citizens including local communities and youth, transnational initiatives, and public-private entities in the global effort to address climate change			Collective action and social organising		Participation	Activism	Yes
				1					0	1		1	3	SPM		00-Summary for Policymakers				45	Climate governance, acting through laws, strategies and institutions, based on national circumstances, supports mitigation by providing frameworks through which diverse actors interact, and a basis for policy development and implementation (medium confidence). Climate governance is most effective when it integrates across multiple policy domains, helps realise synergies and minimise trade-offs, a…			Governance and planning		Participation		Yes
				1					0	1		1	2	18	18-Climate Resilient Development Pathways		18.5	Sectoral and Regional Synthesis of Climate Resilient Developmen	Table 18.6 | Regional synthesis of dimensions of climate resilient development. For each region	2729	Governance can derive legitimacy from inclusion of multiple stakeholders, including women, Indigenous communities and young people (Section 4.6.6) – Indigenous and l#			Governance and planning		Participation		Yes
				1					0	1		1	3	17		17-Accelerating the Transition in the Context of Sustainable Development	17.1	Introduction		1732	This chapter focuses on the opportunities and challenges for “accelerating the transition in the context 4 of sustainable development.” The chapter suggests that accelerating transitions in the context of 5 sustainable development requires more than concentrating on speed. Rather, it involves expediting the 6 pace of change (speed) while also removing the underlying drivers of vulnerability and h…			Governance and planning		Participation	Vulnerability	Yes
	1			1					1	1	1	1	3	12		12-Cross sectoral Perspectives	12.5	Land-related impacts, risks and opportunities associated with 9 mitigation options	Governance of land-related impacts of mitigation option	1304	In emerging domains for governance such as land-based mitigation, global institutions, private sector 22 networks and civil society organisations are also playing key roles in terms of norm-setting. The shared 23 languages and theoretical frameworks, or cognitive linkages (Pattberg et al. 2018) that arise with 24 polycentric governance can not only be helpful in creating expectations and establis…			Governance and planning		Participation		Yes
				1					0	1		1	2	9	09-Africa		9.4		9.4.2.2 Good Governance	1310	TABLE -- Row: Inclusive and diverse stakeholders | Kenya’s Climate Change Directorate has a designated team to integrate gender into its national climate policies (Murray, 2019), while Seychelles’ National Climate Change Council has allocated a seat exclusively for a youth candidate (Government of The Seychelles, 2020). Tanzanian Climate-Smart Agriculture Alliance supports the integration of farm…			Governance and planning		Participation
				1					0	1		1	2	9	09-Africa		9.12		9.12.3 Adaptation	1397	Table 9.13 | Examples of responses to climate change impacts to heritage sites. -- Example: !Xun and Khwe Indigenous Youth of South Africa -- Climate variability causing drought and loss of plants -- Groups (youth) -- Documentation -- Non-formal, local. -- Enhancement, promotion. Bodunrin (2019)			Governance and planning		Participation
				1					0	1		1	2	6	06-Cities Settlements and Key Infrastructure		6.4		6.4.3.4 Enables the Co-production of Adaptation Strategies with Citizens	974	Experiments in including marginalised groups in adaptation planning are starting to emerge in places such as Quito (Ecuador), Lima (Peru), Manizales (Colombia) and Surat (India), where disadvantaged youth, informal settlers and other vulnerable communities are included in discussions of short-/long-term adaptation needs and fair distribution of adaptation resources (Chu, Anguelovski and Carmin, 2…			Governance and planning		Participation		Yes
				1					0	1		1	2	5	05-Food, Fibre and Other Ecosystem Products		5.14		5.14.2.3 System transformation and policy enablers	821	FIGURE -- Youth agency, engagement and employment in food systems Youth as agent of change			Food production/systems		Participation
	1								1	0	1		2	5	05-Food, Fibre and Other Ecosystem Products		5.12		5.12.8 Incorporating Human Rights-Based Approaches into Food Systems	801	A human rights-based approach (HRBA), endorsed by the UN, is one strategy for addressing core inequities that are key drivers for food insecurity and malnutrition of particular groups such as low-income consumers, children, women, small-scale producers and different regions of the world (FAO, 2013; Claeys and Delgado Pugley, 2017; Caron et al., 2018; Le Mouël et al., 2018; Springmann et al., 2018…	Nutrition				Rights		Yes
	1								1	0	1		2	10	10-Asia		10.5	Adaptation Implementation	10.5.6 Social Protection	1524	Towards this end, more effort is needed to improve its existing programmes so that there is an equality of opportunities, along with secured human rights. The example from Nepal’s Child Grant is an indicative of an incremental approach to social policy (Garde et al., 2017).			Economic/health/social systems and protection	General benefit	Rights
				1					0	1		1	2	5	05-Food, Fibre and Other Ecosystem Products		5.13		Box 5.13: Supporting Youth Adaptation in Food Systems	820	Youth play a critical role in all sectors of the food system (HLPE, 2021; Figure Box 5.13.1), and some are actively pursuing work and innovation in agrifood systems (medium confidence) (Sah Akwen, 2017; 2019; Yeboah et al., 2020; Flynn and Sumberg, 2021). Climate change impacts may reduce youth employment options in food systems in some regions, while they are often politically marginalised (Broo…			Food production/systems	General benefit	Rights	Participation
	1								1	0	1		2	5	05-Food, Fibre and Other Ecosystem Products		5.1		5.12.8 Incorporating Human Rights-Based Approaches into Food Systems	801	HRBA includes core principles of participation, accountability, non-discrimination, transparency, human rights, empowerment and rule of law, which can be integrated into policymaking and implementation as part of transforming the food system (FAO, 2013; Caron et al., 2018; Toussaint and Martínez Blanco, 2020). The right to well-being can serve as the overarching umbrella of HRBA to addressing cli…			Economic/health/social systems and protection	General benefit	Rights
	1								1	0	1		2	16	16-Key Risks across Sectors and Regions		16.5	Key Risks Across Sectors and Regions	16.5.2.3.4 Risk to living standards (RKR-D)	2461	Within populations, the poor, women, children, the elderly and Indigenous populations are especially vulnerable due to a combination of factors, including gendered divisions of paid and/or unpaid labour, as well as barriers in access to information, skills, services or resources (Bose, 2017; Thomas et al., 2019b; Anderson and Singh, 2020; Adzawla and Baumüller, 2021) (high confidence). Future str…	Livelihoods				Vulnerability	Gender	Yes
	1								1	0	1		2	12	12-Central and South America		12.3	Hazards, Exposure, Vulnerabilities and Impacts	12.3.1 Central America Sub-region	1698	Climate change is exacerbating socioeconomic vulnerability in CA, a region with high levels of socioeconomic, ethnic and gender inequality, high rates of child and maternal mortality and morbidity, high levels of malnutrition and inadequate access to food and drinking water (ECLAC et al., 2015). Disasters from adverse natural events exacerbate CA’s economic vulnerability, accounting for substanti…	Mortality	Nutrition			Vulnerability	Gender
	1								1	0	1		2	7	07-Health, Wellbeing and the Changing Structure of Communities		7.1		7.1.7.3.7 Vulnerability Experienced through Food Systems	1058	The most vulnerable groups include smallholder farmers, pastoralists, agricultural laborers, poorer households, refugees, indigenous groups, women, children, the elderly and those who are socioeconomically marginalised (FAO et al., 2018; IPCC, 2019b) (high confidence). Men, women, children, the elderly and the chronically ill have different nutritional needs and these vulnerabilities may be ampli…	Nutrition				Vulnerability	Gender	Yes
	1								1	0	1		2	9	09-Africa		9.1		9.10.2.3.1 Mortality and morbidity	1377	Escalating temperatures and longer-duration heatwaves are expected to heavily affect workers already exposed to extreme temperatures, for example, outdoor workers (Kjellstrom et al., 2018) and miners (El-Shafei et al., 2018; Nunfam et al., 2019a; Nunfam et al., 2019b). Vulnerability may also be high for women who cook food for a living, and children who accompany them, due to prolonged exposure t…	Physical health				Vulnerability	Gender
		1							1	0	1		2	7	07-Health, Wellbeing and the Changing Structure of Communities		7.1		7.1.7.3 Heightened Vulnerability to Climate-Related Impacts on Health and Well-Being Experienced by Specific Groups and Through Specific Pathways 7.1.7.3.1 Women and Girls	1051	Climate change poses distinct risks to women’s health. Vulnerability to climate-related impacts on health and well-being shows notable differentiations according to gender, beyond implications for pregnant women. In many societies, differential exposure to such risks relate to gendered livelihood practices and mobility options. Pregnancy and maternal status heighten vulnerability to heat, infecti…	Physical health	Violence & CP			Vulnerability	Gender
	1								1	0	1		2	7	07-Health, Wellbeing and the Changing Structure of Communities		7.2		7.2.4.1 Heat- and Cold-Related Mortality and Morbidity	1066	The drivers of pneumonia incidence are complex and include a range of possible non-climate and climate factors. For example, chronic diseases (e.g., lung disease, chronic obstructive pulmonary disease (COPD) and asthma), other comorbidities, a weak immune system, age, gender, community, passive smoking, air pollution and childhood immunisation may confound the climate pneumonia relationship (Miya…	Physical health				Vulnerability	Gender
		1							1	0	1		2	8	08-Poverty, Livelihoods and Sustainable Development		8.4		8.4.5.2 Future risks, vulnerabilities, differentiated inequalities and livelihood shifts	1217	TABLE 8.4 Summary of interlocking categories differentiation future risks, vulnerabilities, inequality and adaptationncreasing risk of displacement and damage to women and girls in floods Gender inequality leaves women and girls hidden, forgotten and exposed, resulting in displacement impacts and limited resources, including social capital and increasing risk of human trafficking. Increasing futu…	Violence & CP	Mortality			Vulnerability	Gender
		1							1	0	1		2	7	07-Health, Wellbeing and the Changing Structure of Communities		7.1		7.2.7.4 Gendered Dimensions of Climate-Related Conflict	1088	Extreme weather and climate impacts are associated with increased violence against women, girls and vulnerable groups (high agreement, medium evidence). During and after extreme weather events, women, girls and LGBTQI people are at increased risk of domestic violence, harassment, sexual violence and trafficking (Le Masson et al., 2019; Nguyen, 2019;Myrttinen et al., 2015; Chindarkar, 2012). For e…	Violence & CP	WASH			Vulnerability	Gender	Yes
				1					0	1		1	2	11	11-Australasia				Table 11.14 | Key risks from climate change based on assessment of the literature and expert judgement (Supplementary Material SM 11.2). Assessment criteria are magnitude, timing, likelihood and adaptive capacity. Risk drivers are hazards, exposure and vulnerability. Adaptation options describe ways in which risks can be reduced. Confidence ratings are based on the amount of evidence and agreemen…	1637	Vulnerability: Lower adaptive capacity for young/old/sick people, those in low-quality housing and of lower socioeconomic status, and areas served by fragile utilities (power, water). Remote locations with extreme heat and inadequate cooling in housing infrastructure (such as remote indigenous communities).	General burden				Vulnerability	Inequality	Yes
1									1	0	1		2	12	12-Central and South America		12.8	conclusion	12.8 Conclusion	1763	Poverty and extreme poverty rates are higher among children, young people, women, Indigenous Peoples and migrant and rural populations, but urban extreme poverty is also growing (very high confidence). Socioeconomic challenges are being intensified by the COVID crisis. Most countries in CA are already ranked as the highest risk level worldwide due to the region’s high vulnerability to climate cha…	Livelihoods				Vulnerability	Inequality	Yes
	1								1	0	1		2	8	08-Poverty, Livelihoods and Sustainable Development		8.2		8.2.1.6 Interactions Between Climate Hazards and Social- ecological Thresholds	1185	There is robust evidence that both economic and non-economic L&Ds are currently, and will be, unevenly experienced by populations in vulnerable conditions, such as children, women, Indigenous Peoples and traditional communities (Pinho, 2016; Lapola et al., 2018; Roy et al., 2018; Eloy et al., 2019; Machado-Silva et al., 2020).	Livelihoods	General burden			Vulnerability	Inequality	Yes
	1								1	0	1		2	8	08-Poverty, Livelihoods and Sustainable Development		8.4		8.4.5.6 Future Challenges for Vulnerability and Livelihood Security due to Adaptation Limits of People and Ecosystems	1225	Table 8.6 represents different types of adaptation limits (soft or hard) that emerge over time, sometimes concomitantly, that are leading to severe risks to livelihoods in a high poverty, unequal and hotter future, especially among poor and vulnerable populations, and within those Indigenous People, women and children (see Section 16.5.2.3.4). The confidence statements are assessed through the ev…	Livelihoods				Vulnerability	Inequality	Yes
	1								1	0	1		2	12	12-Central and South America		12.5	Adaption	12.5.8.4 Migrations and Displacements	1751	Migration to cities can mean opportunities for migrants and for urban areas, but it can also worsen existing problems, as urban poor people can become even more exposed and vulnerable, and the pressure on urban capacities may not be well absorbed (high confidence) (Chisari and Miller, 2016; Gemenne et al., 2020). Internal migration to cities is likely to exacerbate pre-existing vulnerabilities re…	Migration	General burden			Vulnerability	Inequality	Yes
	1								1	0	1		2	9	09-Africa		9.3		9.3.1 Climate Adaptation Options Adaptation Feasibility and Effectiveness	1302	Mortality and morbidity from increased heat and infectious diseases (including vector-borne and diarrhoeal diseases) Increasing temperatures; heatwaves; precipitation change (both increases and decreases) Vulnerability is highest for the elderly, pregnant women, individuals with underlying conditions, immune-compromised individuals (e.g., from HIV) and young children. Regions without vector contr…	Mortality	Physical health			Vulnerability	Inequality	Yes
	1								1	0	1		2	SPM	00-Summary for Policymakers		B.1.3	B: Observed and Projected Impacts and Risks	B.1.3	9	Jointly, sudden losses of food production and access to food compounded by decreased diet diversity have increased malnutrition in many communities (high confidence), especially for Indigenous Peoples, small-scale food producers and low-income households (high confidence), with children, elderly people and pregnant women particularly impacted (high confidence).	Nutrition				Vulnerability	Inequality	Yes
	1								1	0	1		2	16	16-Key Risks across Sectors and Regions		16.5	Key Risks Across Sectors and Regions	Identification and Assessment of Key Risks and Representative Key Risks	2454	For many risks, low-income populations are particularly vulnerable to KRs. Climate-related impacts on malnutrition and other forms of food insecurity will be larger for this group, along with small-holder farming households and Indigenous communities reliant on agriculture, and for women, children, the elderly and the socially isolated (Section 5.12). KRs in coastal communities are expected to af…	Nutrition				Vulnerability	Inequality	Yes
	1								1	0	1		2	16	16-Key Risks across Sectors and Regions		16.5		Key Risks Across Sectors and Regions	2462	ii) Risks of vector-borne disease would become severe with high warming and current vulnerability, concentrated in children and in sensitive regions (medium confidence). Severity is defined by regionally substantial numbers of additional malaria deaths, disease cases and episodic hospitalisation demands (for dengue	Physical health				Vulnerability	Inequality
	1								1	0	1		2	13	13-Europe		13.7	Health, Well-Being and the Changing Structure of Communities	Observed Impacts and Projected Risks	1860	Attribution studies show that human-induced climate change is increasing the frequency and intensity of heatwaves and has already impacted human health in Europe (Section 13.10.1; Vicedo-Cabrera et al., 2021); for example, the 2010 heatwave in EEU resulted in 55,000 heat-related deaths (Barriopedro et al., 2011; Russo et al., 2015); also, the 2018 heatwave in NEU (Ebi et al., 2021) and the 2019 h…	Physical health				Vulnerability	Inequality	Yes
	1								1	0	1		2	10	10-Asia		10.3	Regional and Sub-regional Characteristics	10.3.3 Demographics and Socioeconomic Characteristics	1468	For vulnerable populations, such as Indigenous Peoples, older and low-income groups, women, children, people with disabilities and minorities, the health effects of climate-change-related extreme weather events can be especially devastating (McGill, 2016). S	Physical health				Vulnerability	Inequality	Yes
	1			1					1	1	1	1	2	8	08-Poverty, Livelihoods and Sustainable Development		8.4		8.4.5.2 Future risks, vulnerabilities, differentiated inequalities and livelihood shifts	1217	TABLE 8.4 Summary of interlocking categories differentiation future risks, vulnerabilities, inequality and adaptation Risk of premature mortality, risk of loss of livelihoods in employment -- Age and ageing populations. Elderly and young are disproportionately impacted by climate change, e.g., heatwave in France 2003 and Japan 2018. Youth underemployed or in vulnerable livelihoods could be vulner…	Physical health	Livelihoods			Vulnerability	Inequality	Yes
	1								1	0	1		2	8	08-Poverty, Livelihoods and Sustainable Development		8.4		8.4.5.4 Future Livelihood Challenges in the Context of Risks and Adaptation Limits	1219	The increasing temperature, droughts and excessive rain lead to successive crop failures and reduced productivity that are affecting children’s growth and health in developing countries (Hanna and Oliva, 2016). Likewise, the expected global temperature increase by the end of the century will have devastating health consequences for children, associated with sea level rise, heatwaves, affecting th…	Physical health	Nutrition			Vulnerability	Inequality
	1								1	0	1		2	7	07-Health, Wellbeing and the Changing Structure of Communities		7.2		7.2.2 Observed Impacts on Communicable Diseases	1062	Vulnerability to VBD is strongly determined by sociodemographic factors (e.g., children, the elderly and pregnant women are at greater risk) with exposure to vectors being strongly influenced by various factors including socioeconomic status, housing quality, healthcare access, susceptibility, occupational setting, recreational activity, conflicts and displacement ( Rocklöv & Dubrow, 2020; Semenz…	Physical health				Vulnerability	Inequality	Yes
	1								1	0	1		2	4	04-Water		4.7		4.7.1.2 Benefits, Including Co-benefits of Water-related Adaptation Responses and Resulting Maladaptation	637	We assess outcomes across five indicators: (a) economic and financial indicators, such as improvements in crop yields and resulting incomes; increase in profits, higher savings or lesser losses from hazards; (b) impacts on vulnerable people, for example, on women, children and Indigenous Peoples;	Physical health				Vulnerability	Inequality	Yes
	1	1	1						3	0	1		2	9	09-Africa		9.7		9.7.2.2 Vulnerability 9.7.2.2 Vulnerability	1346	The literature shows significant gender-differentiated vulnerability and intersectional vulnerability to climate change impacts on water in Africa (Fleifel et al., 2019; Grasham et al., 2019; Mackinnon et al., 2019; Dickin et al., 2020; Lund Schlamovitz and Becker, 2020), although studies are generally lacking in northern Africa (Daoud, 2021). Women and girls are, in most cases, more impacted tha…	WASH				Vulnerability	Intersectionality
	1								1	0	1		2	9	09-Africa		9		Executive Summary	1291	Climate variability and change undermine educational attainment (high agreement, medium evidence). High temperatures, low rainfall and flooding, especially in the growing season, may mean children are removed from school to assist income generation. Early life undernutrition associated with low harvests or weather-related food supply interruptions can impair cognitive development. {9.11.1.2}	Education and play	Physical health			Vulnerability
	1								1	0	1		2	9	09-Africa		9		Executive Summary	1289	In urban areas, growing informal settlements without basic services increase the vulnerability of large populations to climate hazards, especially women, children and the elderly. {9.8.1, 9.9.1, 9.9.3, 9.11.4, Box 9.1}	General burden				Vulnerability		Yes
	1								1	0	1		2	9	09-Africa		Exec Summary		Executive Summary	1289	Exposure and vulnerability to climate change in Africa are multi-dimensional with socioeconomic, political and environmental factors intersecting (very high confidence). Africans are disproportionately employed in climate-exposed sectors: 55–62% of the sub-Saharan workforce is employed in agriculture and 95% of cropland is rainfed. In rural Africa, poor and female-headed households face greater l…	General Burden				Vulnerability		Yes
	1								1	0	1		2	5	05-Food, Fibre and Other Ecosystem Products		5. Exec Summary		5. Exec Summary	717	Climate change impacts everybody, but vulnerable groups, such as women, children, low-income households, Indigenous or other minority groups and small-scale producers, are often at higher risk of malnutrition, livelihood loss, rising costs and competition over resources (high confidence). Increasing competition for land, energy and water exacerbates impacts of climate change on food security (hig…	Livelihoods	Nutrition			Vulnerability		Yes
				1					0	1		1	2	14	14-North America		14.5	Observed Impacts, Projected Risks and Adaptation by Sector	Figure 14.8 | Pathways through which climate change impacts mental health risk in North America	1972	Climate change impacts on mental health and adaptation responses in North America Vulnerability -- Age (e.g., youth and seniors particularly at risk)	Mental health				Vulnerability
	1						1		1	1	1	1	2	7	07-Health, Wellbeing and the Changing Structure of Communities		7.1		7.1.7.3 Heightened Vulnerability to Climate-Related Impacts on Health and Well-Being Experienced by Specific Groups and Through Specific Pathways	1053	Children and adolescents are particularly vulnerable to post-traumatic stress after extreme weather events; the effects may even be longlasting, with impacts on their adult functioning (Brown et al., 2017; UNICEF, 2021; Thiery et al., 2021)	Mental health				Vulnerability
	1						1		1	1	1	1	2	7	07-Health, Wellbeing and the Changing Structure of Communities		7.2		7.2.5.1 Observed Impacts on Mental Disorders	1076	Children and adolescents are particularly vulnerable to post-traumatic stress after extreme weather events (Brown et al., 2017; Hellden et al., 2021; Kousky, 2016), and increased susceptibility to mental health problems may linger into adulthood (Maclean et al., 2016).	Mental health				Vulnerability
	1								1	0	1		2	10	10-Asia		10.3	"Key Systems and Associated Impacts, Adaptation and Vulnerabilities "	0.4.7 Health and Well-Being	1507	Mortality and hospital admissions for circulatory and respiratory diseases are increased after exposures to Asian dust events (high confidence) (Hashizume et al., 2020). El Niño has a major influence on weather patterns in various regions. For example, it causes dry conditions that sometimes result in forest fires and transboundary haze that increased all-cause mortality in children by 41% in Mal…	Mortality				Vulnerability
	1								1	0	1		2	9	09-Africa		9.4		9.4.5.3 Climate Change Literacy	1318	Projected increases in mean temperatures and longer and more intense heat waves (Figure Box 9.1.1) may increase health risks for children and elderly populations by increasing risks associated with heat stress (Bangira et al., 2015; Cairncross et al., 2018). Temperature extremes are associated with increased risk of mortality in Ghana, Burkina Faso, Kenya and South Africa, with greatest increases…	Mortality	Physical health			Vulnerability
	1								1	0	1		2	9	09-Africa		9.1		9.10.2.3.1 Mortality and morbidity	1377	Recent estimates of the burden of mortality associated with the additional heat exposure from recent human-caused global warming suggest approximately 43.8% of heat-related mortality in South Africa was attributable to human-caused climate change from 1991–2018 (Vicedo-Cabrera et al., 2021). In many of South Africa’s 52 districts, this equates to dozens of deaths per year. The elderly and childre…	Mortality	Physical health			Vulnerability
	1								1	0	1		2	8	08-Poverty, Livelihoods and Sustainable Development		8.4		8.4.5.6 Future Challenges for Vulnerability and Livelihood Security due to Adaptation Limits of People and Ecosystems	1225	Heat stress contributes to deaths and health problems among the elderly and children. Specifically, heat stress is currently responsible for 38,000 annual deaths mostly among the elderly, and 48,000 from diarrhoea, 60,000 from malaria and 95,000 from childhood undernutrition (WHO, 2014a; Roy et al., 2018).	Mortality	Physical health			Vulnerability
	1								1	0	1		2	7	07-Health, Wellbeing and the Changing Structure of Communities		7.1		7.1.7.3.1 Women and Girls	1052	MAP -- Examples of vulnerable groups across different context include the following: Children in rural low-income communities | food insecurity, sensitivity to undernutrition and disease | 5.12.3	Nutrition	Physical health			Vulnerability
	1								1	0	1		2	7	07-Health, Wellbeing and the Changing Structure of Communities		7.1		7.1.7.3 Heightened Vulnerability to Climate-Related Impacts on Health and Well-Being Experienced by Specific Groups and Through Specific Pathways	1053	Children are particularly vulnerable to climate change impacts. Children often have unique pathways of exposure and sensitivity to climate hazards, given their immature physiology and metabolism and high intake of air, food and water relative to their body weight as compared with adults (US Global Change Research Group, 2016). Climate change is expected to increase childhood risks of malnutrition…	Nutrition	Physical health			Vulnerability
				1					0	1		1	2	5	05-Food, Fibre and Other Ecosystem Products		5.14		5.14.1 State of Adaptation of Food, Feed, Fibre and Other Ecosystem Products	812	Table 5.23 | State of adaptation in food, fibre and other ecosystem products by actors and vulnerabe groups (source: GAMI database; Berrang-Ford et al., 2021a)). Youth row -- Youth 22 (2%) 24 (2%)	Nutrition				Vulnerability
	1								1	0	1		2	5	05-Food, Fibre and Other Ecosystem Products		5-FAQ		FAQ 5.5: Climate change is not the only factor threatening global food security: other than climate action, what other actions are needed to end hunger and ensure access by all people to nutritious and sufficient food all year round?	834	A flood, for example, may force low-income families out of their homes, affect their employment and reduce their access to food supplies, with prices often rising after natural disasters. Families will have less access to safe water supplies, and this combination of lower food supplies, uncertain employment, displacement from home and rising food costs will increase the number of children who are…	Nutrition				Vulnerability
	1								1	0	1		2	16	16-Key Risks across Sectors and Regions		ES		Executive Summary	2416	All potentially severe risks that apply to particular sectors or groups of people at more specific regional and local levels require high exposure/vulnerability or low adaptation (or both), but do not necessarily require high warming (high confidence). Under these conditions, there would be severe, specific risks to low-lying coastal systems, to people and economies from critical infrastructure d…	Physical health	WASH			Vulnerability
	1								1	0	1		2	16	16-Key Risks across Sectors and Regions		16.5	Key Risks Across Sectors and Regions		2462	With high warming, the CMR for malaria among children under the age of 1 year could increase by 5.2–10.1/10,000 yr−1 in Africa under current vulnerability levels. This estimate assumes a net increase of 70–130 million more people exposed to potential disease transmission due to climate change in a high-warming scenario (RCP8.5, end of century) (Caminade et al., 2014; Colón-González et al., 2021; …	Physical health				Vulnerability
	1								1	0	1		2	14	14-North America		14.5	Observed Impacts, Projected Risks and Adaptation by Sector	Table 14.5 | A summary of adaptation options for different health outcomes in North America	1968	Climate change is projected to increase water-borne disease risks (medium confidence), particularly in areas with ageing water and wastewater infrastructure in North America (high confidence). In Wisconsin, USA, precipitation changes are projected to increase gastrointestinal illness in children this century (A1B, A2, B1) (Uejio et al., 2017). Slight reductions in precipitation-associated gastroi…	Physical health	WASH			Vulnerability
	1								1	0	1		2	9	09-Africa		9		Executive Summary	1290	Heat waves on land, in lakes and in the ocean will increase considerably in magnitude and duration with increasing global warming (very high confidence). Under a 1.5°C-compatible scenario, children born in Africa in 2020 are likely to be exposed to 4–8 times more heat waves compared to people born in 1960, increasing to 5–10 times for 2.4°C global warming. The annual number of days above potentia…	Physical health	Mortality			Vulnerability
	1								1	0	1		2	9	09-Africa		9.5		9.5.5.1.2 Projections	1327	Children born in 2020, under a 1.5°C-compatible scenario will be exposed to 3–5 times more heatwaves in their lifetimes compared to people born in 1960; this exposure increases to 4–9 times more heatwaves at GWL 2.4°C (Thiery et al., 2021). The number of potentially lethal heat days per year is projected to increase from <50 during 1995–2005 to <50 at GWL 1.6°C, 50–120 at GWL 2.5°C and 150–350 at…	Physical health	mortality			Vulnerability
1	1								2	0	1		2	9	09-Africa		9.1		9.10.2.3.1 Mortality and morbidity	1376	Infants and children (<5 years) are listed as vulnerable population groups on the "Pathways to impact: diarrhoeal disease" schematic	Physical health				Vulnerability
	1								1	0	1		2	9	09-Africa		9.1		9.10.2.3.2 Heat stress in specific settings	1377	Vulnerability may also be high for women who cook food for a living, and children who accompany them, due to prolonged exposure to high temperatures (Parmar et al., 2019). Prisons, commonly poorly ventilated and overcrowded, are also high-risk settings (Van Hout and Mhlanga-Gunda, 2019).	Physical health				Vulnerability
	1								1	0	1		2	9	09-Africa		9.1		9.10.2.7 Air Quality-related Health Impacts	1379	Women and children who are exposed to high particulate matter concentrations when cooking indoors and HIV-infected people are more vulnerable to the health impacts of air pollution (Abera et al., 2021). I	Physical health				Vulnerability
1									1	0	1		2	9	09-Africa		9.1		9.10.3.4.1 Adaptation to prevent malaria	1383	In malaria-endemic areas, repeated malaria infections can provide temporary immunity, which reduces new clinical cases (Laneri et al., 2015; Yamana et al., 2016). Conversely, where people have little or no immunity, exposure to malaria can lead to epidemics (Semakula et al., 2017a; Ryan et al., 2020). Pregnant women and infants remain at risk of severe malaria, regardless of immunity status. Vect…	Physical health				Vulnerability
	1								1	0	1		2	7	07-Health, Wellbeing and the Changing Structure of Communities		7.2		7.2.3.4 Diabetes	1073	Although older adults have inherent sensitivities to temperature-related health impacts (Bunker et al., 2016; Phung et al., 2016), children can also be affected by extreme heat (Xu et al., 2014).	Physical health				Vulnerability
	1								1	0	1		2	7	07-Health, Wellbeing and the Changing Structure of Communities		7.2		7.2.4.1 Heat- and Cold-Related Mortality and Morbidity	1075	Maternal and neonatal disorders accounted for 3.7% of total global deaths and 7.8% of global DALYs in 2019 (Vos et al., 2020). Children and pregnant women have potentially higher rates of vulnerability and/or exposure to climatic hazards, extreme weather events and undernutrition (Garcia and Sheehan, 2016; Sorensen et al., 2018; Chersich et al., 2018). Available evidence suggests that heat is ass…	Physical health				Vulnerability
	1								1	0	1		2	6	06-Cities Settlements and Key Infrastructure		6.2		6.2.2 Dynamic Interaction of Urban Systems with Climat	924	Heatstress and dehydration are also related to behavioural and learning concerns, with dehydration impairing concentration and cognition for both adults and children (Merhej, 2019). Literature on paediatric heat exposure is associated with increases in emergency department visits for heat-related illnesses, electrolyte imbalances, fever, renal disease and respiratory disease in young children (Wi…	Physical health	Education and play			Vulnerability
	1								1	0	1		2	6	06-Cities Settlements and Key Infrastructure		6.2		6.2.6 Impacts and Risks of Urban Adaptation Actions	939	TABLE - Increased environmental health risks when using polluted groundwater. (6.2.3 Vulnerability of users such as women; children; the elderly; ill or disabled. (6.3.4.6)	WASH	Physical health			Vulnerability		Yes
	1								1	0	1		2	4	04-Water		FAQ 4.3		FAQ 4.3 | How will climate change impact the severity of water-related disasters, such as droughts and floods?	663	Finally, vulnerable groups such as people living in poverty, women, children, Indigenous Peoples, uninsured workers and the elderly will be the most affected by water-related disasters.	WASH				Vulnerability		Yes
	1								1	0	1		2	10	10-Asia		10.6	Adaptation Implementation	10.6.2 Disaster Risk Reduction and Climate-Change Adaptation Linkages	1529	The sectors to which CCA and DRR have been linked are varied. For example, Filho et al. (2019) assessed adaptive capacity and resilience to climate change based on urban poverty, infrastructure and community facilities; Mabon et al. (2019) looked at adaptation via the built environment, green roofs, and citizen and private-sector involvement in smaller-scale greening actions; Lama and Becker (201…			Community adaptation	General benefit	Vulnerability		Yes
	1								1	0	1		2	10	10-Asia		10.5	Adaptation Implementation	10.5.6 Social Protection	1523	Social protection programmes assist individuals and families, especially the poor and vulnerable, cope with crises and shocks, finds jobs, improve productivity, invest in the health and education of their children, and protect the ageing population (Bank, 2018b).			Economic/health/social systems and protection	General benefit	Vulnerability
	1								1	0	1		2	6	06-Cities Settlements and Key Infrastructure		6.4		6.4.6 Monitoring and Evaluation Frameworks for Adaptation Used in Cities, Settlements and Infrastructures	980	Urban adaptation plans can focus attention on the needs of marginalised or vulnerable communities including the elderly, children and the disabled (Dahiya and Das, 2020; Yang, Lee and Juhola, 2021)			Community adaptation	General benefit	Vulnerability		Yes
	1								1	0	1		2	6	06-Cities Settlements and Key Infrastructure		6.4		FAQ6.4	994	Second, the capacity of communities needs to be strengthened, especially among those in informal settlements, the poorest and other vulnerable groups including minorities, migrants, women, children, elderly, disabled and people with serious health conditions such as obesity			Governance and planning	General Benefit	Vulnerability		Yes
	1								1	0	1		3	9		09-Buildings	9.8	Links to sustainable development	9.8.2Climate mitigation actions in buildings and health impacts////9.8.2.2 Energy/fuel poverty, indoor environmental quality and health	1002	The health benefits of residents due to mitigation actions in buildings are significant (for a review see 4 (Maidment et al. 2014; Fisk et al. 2020; Thomson and Thomas 2015)), and are higher among low 5 income households and/or vulnerable groups, including children, the elderly and those with pre-existing 6 illnesses (Maidment et al. 2014; IEA 2014; Ortiz et al. 2019). (Tonn et al. 2018) estimate…			Built environment	Health	Vulnerability		Yes
1									1	0	1		2	9	09-Africa		9.1		9.10.3.4.1 Adaptation to prevent malaria	1383	Health promotion initiatives include promoting adequate hydration and simple cooling measures, such as drinking cold liquids, water sprays and raising awareness of the symptoms and importance of heat stress, including heatstroke (Aljawabra and Nikolopoulou, 2018). Adaptive measures are especially important for high-risk groups such as outdoor workers, the elderly, pregnant women and infants.			Economic/health/social systems and protection	Health	Vulnerability		Yes
	1								1	0	1		2	6	06-Cities Settlements and Key Infrastructure		6.3		6.3.5.6 Water and Sanitation	957	Where formal sewerage provision is lacking, community based adaptation that incorporates both the function of the sanitation system and the vulnerability of users (e.g., women, children, elderly, ill or disabled) into the design is essential (Duncker, 2019).			Community adaptation	Health	Vulnerability		Yes
	1								1	0	1		2	9	09-Africa		9.4		9.4.2.2 Good Governance	1310	This requires the creation of avenues for the voices of marginalised groups in policy processes and enabling policy environments that can catalyse inclusive action and transformational responses to climate change (Totin et al., 2018; Revi et al., 2020; Ziervogel et al., 2021), safeguarding protection against the climate harms of the most vulnerable in society, particularly of women and children (…			Governance and planning	Voice and political engagement	Vulnerability	Participation
				1					0	1		1	2	6	06-Cities Settlements and Key Infrastructure		6.4		6.4.3.3 Facilitates Coordination Across Separate Actors and Interests	971	The pilot project #OurChangingClimate is one example of engaging youth with an understanding of their communities and their resilience or vulnerability to climate change (Napawan, Simpson and Snyder, 2017).			Climate-change education		Vulnerability
	1			1			1		1	2	1	1	2	9	09-Africa		9.11		9.11.1.2 Human Capital Development and Education	1387	Much progress has been made in improving education access, however, in sub-Saharan Africa, 32% of children, adolescents and youth (~97 million people) remain out of school (UNESCO Institute of Statistics, 2018). Climate variability and change can undermine educational attainment with negative impacts on later life earning potential and adaptive capacity to future climate change (Figure 9.11; Lutz…	Education and play
	1								1	0	1		2	9	09-Africa		9.11		9.11.1.2 Human Capital Development and Education	1387	More research is needed on climate change impacts on education in Africa. This information can help ensure families keep children in school amid climate-related income shocks. For example, in Mexico, a conditional cash transfer programme mitigated the negative effect of natural disasters on school attendance. (de Janvry et al., 2006).	Education and play
	1								1	0	1		2	7	07-Health, Wellbeing and the Changing Structure of Communities		7.1		7.1.7.3 Heightened Vulnerability to Climate-Related Impacts on Health and Well-Being Experienced by Specific Groups and Through Specific Pathways	1053	Outdoor recreational opportunities for children may be reduced by extreme weather events, heat and poor air quality (Evans, 2019).	Education and play
	1								1	0	1		3	1		01-Introduction and Framing	1.3	1.3 The Multilateral Context, Emission Trends and Key Developments	1.3.3 Some Other Key Trends and Development	162	The COVID-19 pandemic triggered the deepest global economic contraction as well as CO2 emission 36 reductions since the Second World War (Section 2.2.2.1 in Chapter 2; AR6 WGI Box 6.1 in Chapter 6) drivers) may last far longer. COVID-19 pushed more than 100 million people back into extreme poverty, and reversed progress towards some other SDGs including health, life expectancy and child literacy …	Education and play
	1			1					1	1	1	1	3	2		02 - Emissions Trends and Drivers				262	An increase in the dependency ratio – that is, the proportion of children aged under 15 and people over 65 relative to the working- age population – in other analyses, has been shown to lead to reduced CO2 emissions in China (Wei et al. 2018; Li and Zhou 2019). Implications of the nature of this relationship are important to policy discussions of working hours and retirement age that are likely t…	General burden
	1								1	0	1		2	8	08-Poverty, Livelihoods and Sustainable Development		8.3		8.3.4.1 Economic (e.g., Income, Assets) Impacts of Climate Change and Vulnerability	1206	Across South America, groups of farmers, children, elderly, Indigenous Peoples and traditional communities are increasingly exposed to floods, droughts, wild forest fires and losses in crop yields, resulting in significant economic costs (medium evidence, high agreement)	Livelihoods						Yes
				1					0	1		1	2	13	13-Europe		13.7	Health, Well-Being and the Changing Structure of Communities		1863	There is emerging evidence across Europe that young people may be experiencing anxiety about climate change, although it is unclear how widespread or severe this is (Hickman, 2019). In northern Italy, the number of daily emergency psychiatric visits and mean daily air temperature has been linked (Cervellin et al., 2014)	Mental health
	1								1	0	1		2	7	07-Health, Wellbeing and the Changing Structure of Communities		7.2		7.2.5.1 Observed Impacts on Mental Disorders	1078	Mental health impacts can emerge as result of climate impacts on economic, social and food systems (high confidence). For example, malnutrition among children has been associated with a variety of mental health problems (Adhvaryu et al., 2019; Hock et al., 2018; Yan et al., 2018), as has food insecurity among adults (Lund et al., 2018).	Mental health	Nutrition
	1								1	0	1		2	7	07-Health, Wellbeing and the Changing Structure of Communities		7.2		7.2.5.2 Observed Impacts on Well-Being	1079	Systematic reviews have found an association between higher ambient levels of fine airborne particles with cognitive impairment in the elderly and with behavioural problems (related to impulsivity and attention problems) in children (Power et al., 2016; Yorifuji et al., 2017; Younan et al., 2018; Zhao et al., 2018b) (medium confidence).	Mental health
				1					0	1		1	2	4	04-Water		4.6		4.6.8 Adaptations Through Human Mobility and Migration	633	More research on how to ensure migration becomes a successful adaptation strategy is needed (McLeman et al., 2016). In addition, impacts on women, youth and marginalised groups (McLeman et al., 2016; Miletto, 2017) and immobility issues need more attention (Zickgraf, 2018).	Migration						Yes
1									1	0	1		2	10	10-Asia		10.4		10.4.7.1 Observed Impacts	1507	High temperatures affect mortality and morbidity in Asia (high confidence). In addition to all-cause mortality (Dang et al., 2016; Chen et al., 2018e), deaths related to circulatory, respiratory, diabetic (Li et al., 2014b) and infectious diseases (Ingole et al., 2015), as well as infant mortality (Son et al., 2017), are increased with high temperature (high confidence)	Mortality	Physical health
	1								1	0	1		2	9	09-Africa		9.2		Table 9.2	1302	Mortality and morbidity from increased heat and infectious diseases (including vector-borne and diarrhoeal diseases). Vulnerability is highest for the elderly, pregnant women, individuals with underlying conditions, immune-compromised individuals (e.g., from HIV) and young children	Mortality	Physical health					Yes
1									1	0	1		2	4	04-Water		CCP4.4.7		CCP4.4.7 Governance and Finance for Sustainable Development	2253	In low-income areas of the Mediterranean Basin and sub-Saharan Africa regions higher poverty rates, malnutrition and elevated infant mortality are coupled with higher fertility, implying a higher rate of population growth that in turn can generate more poverty. These demographic cycles can in turn interact with climatic impacts and conflict-induced displacement and migration processes.	Mortality	Nutrition
	1								1	0	1		2	4	04-Water		4.6		4.6.1 Key Risks Related to Water	622	Although globally, the regional potential infestation areas for disease-carrying vectors could be five times higher at 4°C than at 2°C (Liu-Helmersson et al., 2019), climate projections suggest up to 2.2 million more cases of E. coli by 2100 (2.1°C increase) in Bangladesh (Philipsborn et al., 2016), up to an 11-fold and 25-fold increase by 2050 and 2080, respectively (2°C–4°C increase), in disabi…	Mortality	Physical health
	1								1	0	1		3	12		12-Cross sectoral Perspectives	12.4	Food systems	12.4.2 GHG emissions from food systems	1283	To visualise several food systems dimensions in a GHG context, Figure 12.7 shows GHG emissions 8 per capita and year for regional country aggregates (Crippa et al. 2021a,b), indicated by the size of the 9 bubbles. The GHG emissions presented here are based on territorial accounting similar to the UNFCCC 10 GHG inventories: emissions are assigned to the country where they occur, not where food is …	Nutrition	Mortality
	1								1	0	1		3	12		12-Cross sectoral Perspectives	12.4	Food systems	Figure 12.7 - Territorial national per capita GHG emissions from food systems	1284	GHG emissions are calculated according to the IPCC Tier 1 approach and are assigned to the country where they occur, not necessarily where the food is consumed. Health outcome is expressed as relative contribution of each of the following risk factors to their combined risk for deaths: Child and maternal malnutrition (red), Dietary risks (yellow) or High body-mass index (blue).	Nutrition	Physical health
	1								1	0	1		3	12		12-Cross sectoral Perspectives	12.4	Food systems	Figure 12.7 - Territorial national per capita GHG emissions from food systems	1284	The colours of the bubbles indicate the relative contribution of the following risk factors to deaths, according to the classification used in the Global Burden of Disease Study: child and maternal malnutrition (red, deficiencies of iron, zinc or Vitamin A, or low birth weight or child growth failure), dietary risks (yellow, for example diets low in vegetables, legumes, whole grains or diets high…	Nutrition	Physical health
	1								1	0	1		2	9	09-Africa		9.8		9.8.1 Vulnerability to Observed and Projected Impacts from Climate Change	1350	Non-climatic stressors aggravate food insecurity in many parts of the continent, including lack of access to production inputs and land, lack of education and limited income sources, with adverse climate impacts on agriculture reducing education attainment for children (Section 9.11.1.2; Evariste et al., 2018; Fuller et al., 2018).	Nutrition	Education and play
	1								1	0	1		2	9	09-Africa		9.1		9.10.2.5.2 Projected risks	1379	Projected risks for malnutrition in Africa are high (FAO, 2016; see Section 9.8.1): 433 million people in Africa are anticipated to be undernourished by 2030 (FAO et al., 2020) and, compared to 1961– 1990, 1.4 million additional African children will suffer from severe stunting by 2050 under 2.1°C global warming (WHO, 2014).	Nutrition	Physical health
	1								1	0	1		2	8	08-Poverty, Livelihoods and Sustainable Development		8.3		8.3.2.1.2 People residing in most vulnerable versus least vulnerable regions	1198	MAP -- Children in rural low-income communities | food insecurity, sensitivity to undernutrition and disease	Nutrition	Physical health
	1								1	0	1		2	8	08-Poverty, Livelihoods and Sustainable Development		8.3		8.3.4.1 Economic (e.g., Income, Assets) Impacts of Climate Change and Vulnerability	1207	Extreme climatic events pose serious disruptions to local livelihoods and asset bases, requiring people to reconstruct, transform and diversify livelihoods (Uddin et al., 2021). Examples of livelihood shifts across Asia and Southeast Asia (e.g., Bangladesh, India, Philippines, Vietnam) include rural communities in coastal areas, urban settlements that are experiencing economic losses (high confid…	Nutrition
	1								1	0	1		2	8	08-Poverty, Livelihoods and Sustainable Development		8.3		8.3.5.1 Livelihood Shifts Resulting from L&D from Climate Change	1209	Examples of livelihood shifts across Asia and Southeast Asia (e.g., Bangladesh, India, Philippines, Vietnam) include rural communities in coastal areas, urban settlements that are experiencing economic losses (high confidence) from, for example, crop failure and reduced access to fish, which contribute to non-economic losses associated with involuntary migration (Ghosh, 2018) and the malnutrition…	Nutrition
	1								1	0	1		2	7	07-Health, Wellbeing and the Changing Structure of Communities		7.2		7.2.4.4 Observed Impacts on Malnutrition	1075	At the same time, diseases associated with high-calorie, unhealthy diets are increasing globally, with 38.3 million overweight children under five years of age (Global Nutrition Report, 2018), 2.1 billion overweight or obese adults and the global prevalence of diabetes almost doubling in the past 30 years (Swinburn et al., 2019). Unbalanced	Nutrition	Physical health
	1								1	0	1		2	7	07-Health, Wellbeing and the Changing Structure of Communities		7.2		7.2.4.4 Observed Impacts on Malnutrition	1075	Globally, more than 690 million people are undernourished, 144 million children are stunted (chronic undernutrition), 47 million children are wasted (acute undernutrition), and more than 2 billion people have micronutrient deficiencies (FAO, 2020). More than 135 million people across 55 countries experienced acute hunger requiring urgent food, nutrition and livelihood assistance in 2019 (FSIN/GNA…	Nutrition	Physical health
	1								1	0	1		2	7	07-Health, Wellbeing and the Changing Structure of Communities		7.2		7.2.4.4 Observed Impacts on Malnutrition	1075	In the largest global study to date exploring the connections between child diet diversity and recent climate, data from 19 countries in six regions (Asia, Central America, South America, north Africa, southeast Africa and west Africa) indicated significant reductions in diet diversity associated with higher temperatures and significant increases in diet diversity associated with higher precipita…	Nutrition	Physical health
	1								1	0	1		2	5	05-Food, Fibre and Other Ecosystem Products		5.8		5.8.2.1 Food security: provision and nutrition	764	The importance of seafood in food security and nutrition is increasing, largely due to its contribution as high-quality food (high confidence) (Hicks et al., 2019), as seafood contains unique long- chain polyunsaturated fatty acids (LC-PUFAs) and highly bioavailable essential micronutrients—vitamins (A, B and D) and minerals (calcium, phosphorus, iodine, zinc, iron and selenium). These compounds,…	Nutrition	Physical health
	1								1	0	1		2	5	05-Food, Fibre and Other Ecosystem Products		5.12		5.12.3.1 Impacts on food availability	795	There is growing evidence that anthropogenic climate warming has already intensified climate extreme events induced by large-scale SST oscillations such as ENSO (Herring et al., 2018; Seneviratne et al., 2021). For example, the 2015–2016 El Niño, the strongest in the past 145 years, induced severe droughts in Southeast Asia and eastern and southern Africa, some intensified by anthropogenic warmin…	Nutrition	Physical health
	1								1	0	1		2	5	05-Food, Fibre and Other Ecosystem Products		5.12		5.12.8 Incorporating Human Rights-Based Approaches into Food Systems	801	Given identified linkages between higher temperatures and extreme events with declines in child dietary diversity, safeguarding diverse diets is one important adaptation priority (Niles et al., 2021). Humanitarian responses are appropriate for short-term acute hunger, while in the medium term, home-grown school feeding programmes with diverse foods can support child nutrition and learning, and wi…	Nutrition	Physical health
	1								1	0	1		2	5	05-Food, Fibre and Other Ecosystem Products		5.12		5.12 Food Security, Consumption and Nutrition // 5.12.1 Introduction	793	TABLE -- Climate change extreme events make fruits and vegetables relatively unaffordable compared with less-nutrient-dense foods. Urban low-income households and rural households who purchase the majority of their food. Children in regions such as West Africa, with lower access to diverse food types as a result of climate impact drivers, e.g., drought. An et al. (2018), Algur et al. (2021), Bake…	Nutrition
	1								1	0	1		2	5	05-Food, Fibre and Other Ecosystem Products		5.12	Food Security, Consumption and Nutrition		796	One study of 87 countries and 150 extreme events estimated that low-income food deficit and landlocked countries had reduced nutrient supply ranging from −1.6 to −7.6% of average supply, a significant portion of a healthy child’s average dietary intake (Park et al., 2019)	Nutrition
	1								1	0	1		3	12		12-Cross sectoral Perspectives	12.4	Food systems	12.4.1 Introduction	1280	Malnutrition aggravates susceptibility of children to various infectious diseases (Farhadi and 16 Ovchinnikov 2018; França et al. 2009), and infectious diseases can also decrease nutrient 17 uptake, thereby promoting malnutrition (Farhadi and Ovchinnikov 2018). Contamination of 18 food with bacteria, viruses, parasites and microbial toxins can cause foodborne illnesses 19 (Abebe et al. 2020; Ricc…	Physical health	Nutrition
	1								1	0	1		2	10	10-Asia		10.4	Key Systems and Associated Impacts, Adaptation and Vulnerabilities	0.4.7 Health and Well-Being	1508	The global estimates for increases in deaths due to diarrhoeal disease (annual estimates) in children under 15 years in 2030 and 2050 are approximately 48,000 and 33,000 additional deaths, respectively, under the medium-to-high emissions scenario (World Health Organization, 2014)	Physical health	Mortality
	1								1	0	1		3	9		09-Buildings	9.8	Links to sustainable development	9.8.2 Climate mitigation actions in buildings and health impacts 9.8.2.1 Lack of access to clean energy	1000	In 2018, approximately 2.8 billion people worldwide, most of whom live in Asia and Africa, still use 39 polluting fuels, such as fuelwood, charcoal, dried crops, cow dung, etc., in low-efficiency stoves for 40 cooking and heating, generating household air pollution (HAP), which adversely affects the health of 41 the occupants of the dwellings, especially children and women (World Health Organizat…	Physical health
	1								1	0	1		2	9	09-Africa		9.1		9.10.2.2.2 HIV Observed impacts	1375	Although levels of new HIV infections declined sharply during the last decade, still more than a million adults and children become infected each year (UNAIDS, 2020).	Physical health
	1								1	0	1		2	7	07-Health, Wellbeing and the Changing Structure of Communities		7.1		7.1.4 Interpretation of ‘Health and Well-Being’ Used in This Chapter	1049	Although this chapter assesses physical health, mental health and general well-being separately, they are inter-connected; any type of health problem can reduce overall well-being and vice versa. For example, a child receiving inadequate nutrition may not be sick but is experiencing a clear threat to well-being that has implications for future physical and mental health.	Physical health	Mental health
1	1								2	0	1		2	7	07-Health, Wellbeing and the Changing Structure of Communities		7.2		7.2.2.3 Observed Impacts on Food-Borne Diseases	1066	The prevalence of childhood cryptosporidiosis, which is the second leading cause of moderate to severe diarrhoea among infants in the tropics and subtropics, shows associations with population density and rainfall, with contamination due to Cryptosporidium spp. being 2.61 times higher during and after heavy rain (Lal et al., 2019; Young et al., 2015; Khalil et al., 2018).	Physical health
	1								1	0	1		2	7	07-Health, Wellbeing and the Changing Structure of Communities		7.2		7.2.2 Observed Impacts on Communicable Diseases	1064	In Ethiopia, South Africa and Senegal, increases in temperatures are associated with increases in diarrhoea, while in Ethiopia, Senegal and Mozambique, increases in monthly rainfall are associated with an increase in cases of childhood diarrhoea (Azage et al., 2015; Thiam et al., 2017; Horn et al., 2018). Similar associations between weather and diarrhoea have been observed in Cambodia, China, Ba…	Physical health
	1								1	0	1		2	7	07-Health, Wellbeing and the Changing Structure of Communities		7.2		7.2.2.4 Respiratory Tract Infections	1066	Day-to-day variations in temperature also appear important. For Australia, increases in emergency room visits for childhood pneumonia are associated with sharp temperature drops (Xu et al., 2014). Large inter-daily changes in temperature are important for respiratory disease incidence in Guangzhou, China (Lin et al., 2013) and Shanghai (Lei et al., 2021) while rapidly changing and extreme tempera…	Physical health
1									1	0	1		2	7	07-Health, Wellbeing and the Changing Structure of Communities		7.2		7.2.4.1 Heat- and Cold-Related Mortality and Morbidity	1066	Outbreaks of human and animal Cryptococcus have been reported as being associated with a combination of climatic factors and shifts in host and vector populations (Chang and Chen, 2015; Rickerts, 2019). The prevalence of childhood cryptosporidiosis, which is the second leading cause of moderate to severe diarrhoea among infants in the tropics and subtropics, shows associations with population den…	Physical health
	1								1	0	1		2	7	07-Health, Wellbeing and the Changing Structure of Communities		7.3	7.3 Projected Future Risks under Climate Change	Figure Projected annual additional deaths attributable to climate change, in 2030 and 2050 compared to 1961–1990	1089	Diarrhoeal disease in children under 15 years	Physical health
			1						1	0	1		2	6	06-Cities Settlements and Key Infrastructure		CCP6		CCP6.2.6 Human Health and Wellness in the Arctic	2340	Emerging environmental exposures to pathogens is also a concern. In 2016, a Nenets boy and over 200,000 reindeer died from anthrax linked to warming environments (Ezhova et al., 2021)—a risk which is projected to increase with climate change (Liskova et al., 2021).	Physical health	Mortality
	1								1	0	1		2	4	04-Water		4.5		4.5.3 Projected Risks to Water, Sanitation and Hygiene (WaSH)	616	In addition,an additional 48,000 deaths of children under 15 years of age globally from diarrhoea by 2030 are also projected (WHO, 2014).	Physical health	Mortality
	1								1	0	1		2	4	04-Water		4.3	Observed Sectoral Impacts of Current Hydrological Changes	4.3.3 Observed Impacts on Water, Sanitation and Hygiene (WaSH	585	For example, the rainy season in Senegal has been associated with an 84% increase in relative risk of childhood diarrhoea, and an additional wet day per week was associated with up to 2% increases in diarrhoeal disease in Mozambique (Thiam et al., 2017; Horn et al., 2018). In Ecuador, increases of 1.5 cases of diarrhoea per 1000 were associated with heavy rainfall after dry periods, while a decre…	Physical health	WASH
1	1								2	0	1		2	2	02-Terrestrial and Freshwater Ecosystems and Their Services		2.6		2.6.4 Adaptation for Increased Risk of Disease	292	Table outlining Observed climate change impacts on cholera, dengue and malaria incidence. Southeast Asia: infants (<9 years) with highest incidences of cholera South Asia: older children and young adults (aged 16–20 years) more frequently reported with cholera than non-cholera diarrhoea	Physical health
	1								1	0	1		3	17		17-Accelerating the Transition in the Context of Sustainable Development	17.3	Assessment of the results of studies where decarbonisation transitions are framed within the context of sustainable development	17.3.2 Short-term and long-term transitions///////17.3.2.2 Renewable energy penetration and fossil-fuel phase-out	1744	Chapter 10 also provides a more detailed assessment of the issues involved in mining these rare metals, 2 as well as the associated social problems, including exploitative working conditions and child labour, 3 the latter a major issue that needs to be taken into consideration in transitions. Recycling batteries is 4 also highlighted as a major supplementary policy if negative environmental side …	Violence & CP
	1								1	0	1		2	16	16-Key Risks across Sectors and Regions		16.5	Key Risks Across Sectors and Regions	16.5.2.3.7 Risk to water security (RKR-G	2463	Moreover, a projected decrease in water scarcity in some regions does not prevent the increase in water scarcity in other regions becoming severe. Hence there is high confidence that risks to water scarcity have the potential to become severe due to climate change. Consequences of water scarcity include potential competition and conflicts between water users (Vanham et al., 2018), damaging liveli…	WASH	Physical health
	1								1	0	1		2	16	16-Key Risks across Sectors and Regions		16.3	Synthesis of Observed AdaptationRelated Responses	table 16.2 | Observed examples of maladaptation and co-benefits from adaptation-related responses in human systems.	2440	Table 16.2 | Observed examples of maladaptation and co-benefits from adaptation-related responses in human systems Return to traditional land management practices (e.g., the Ngitili system) -- Observed maladaptation: Mitigation, especially carbon sequestration; increased water availability for household and livestock use; increase in presence of edible and medicinal plants; regional economic grow…			Economic/health/social systems and protection	Education and play
				1					0	1		1	2	15	15-Small Islands		15.7	7 Climate Resilient Development Pathways and Future Solutions in Small Islands	Table 15.7 | Enabling conditions and factors for adaptation in small islands	2092	Table 15.7 | Enabling conditions and factors for adaptation in small islands. Increased access to climate information -- Example -- Dissemination of adaptation skills and significance to youth (e.g., ecocamps in Fiji)			Climate-change education	Education and play
	1								1	0	1		2	15	15-Small Islands		15.5	Assessment of Adaptation Options and Their Implementation	15.5.6 Livelihood Responses	2079	Given changes in climatic conditions, in Puerto Rico women in the coffee industry are now forming their own ‘micro-clusters’ of complementary activities, such as rebuilding of public spaces, running environmental education programmes for children, and opening new commercial enterprises (e.g., coffee shops, and food products) that do not rely on traditional coffee supply chains or government assis…			Community adaptation	Education and play
	1								1	0	1		3	9		09-Buildings	9.8	Links to sustainable development	9.8.4 Social well-being////9.8.4.2 Improved access to energy sources, gender equality and time savings	1003	Electrification of remote rural areas and other regions that do not have access to electricity enables 12 people living in poor developing countries to read, socialize, and be more productive during the evening, 13 while it is also associated with greater school attendance by children (Torero 2015; Rao et al. 2016; 14 Barnes and Samad 2018). (Chakravorty et al. 2014) found that a grid connection …			Built environment	Education and play
	1								1	0	1		3	9		09-Buildings	9.8	Links to sustainable development	9.8.5 Economic implications of mitigation actio///9.8.5.1 Buildings-related labour productivity	1004	Low-carbon buildings, and particularly well-designed, operated and maintained high-performance 24 buildings with adequate ventilation, may result in productivity gains and improve the competitiveness 25 of the economy through three different pathways (Bleyl et al. 2019; Thema et al. 2017; Niemelä et al. 26 2017; Mofidi and Akbari 2017; MacNaughton et al. 2015) (European Commission 2016): (i) incr…			Built environment	Education and play
	1								1	0	1		3	9		09-Buildings	9.8	Links to sustainable development	table 9.4 Aspects of mitigation actions in buildings and their contributions to the 2030 Sustainable 2 Development Goal	1000	SDG 4: Energy efficiency measures result in reduced school absenteeism due to better indoor environmental conditions. Also, fuel poverty alleviation increases the available space at home for reading. Improved access to electricity and clean fuels enables people living in poor developing countries to read, while it is also associated with greater school attendance by children.			Built environment	Education and play
		1							1	0	1		2	7	07-Health, Wellbeing and the Changing Structure of Communities		7.4.2.6 Multi-sectoral Adaptation for Risks of Malnutrition		Table 7.7 | Summary of adaptation options for key risks associated with malnutrition.	1111	Adaptation options with high potential for reducing risk associated with malnutrition: Improved education for girls and women			Economic/health/social systems and protection	Education and Play
	1								1	0	1		3	6		06-Energy Systems	6.7	Low-Carbon Energy System Transitions in the Near- and Medium Term	6.7.7 The Costs and Benefits of Low-Carbon Energy System Transitions in the Context 20 of Sustainable Developmen	705	Increasing electrification will support and reduce the costs of key elements of human development, such 16 as education, health, and employment) (high confidence). Greater access to electricity might offer 17 greater access to irrigation opportunities for agricultural communities (Peters and Sievert 2016) which 18 could have the potential increasing farmer incomes in support of SDG-1. Coordinated…			Built environment	Education and play
	1								1	0	1		2	6	06-Cities Settlements and Key Infrastructure		6.2		6.3.3.5 Education and Communication	946	Given the amount of time that children spend in school settings, adapting educational infrastructure and programmes to climate change is highly important. This includes not only making physical structures safe, but also providing students with the knowledge and confidence to support individual and family-based adaptation. Several UN agencies (e.g., UNICEF and UNDRR) and international non-governme…			Built environment	Education and play
	1								1	0	1		2	2	02-Terrestrial and Freshwater Ecosystems and Their Services			Terrestrial and Freshwater Ecosystems and Their Services		300	Lessons learnt from Durban’s experience include the importance of meaningful partnerships, long-term financial commitments (Douwes et al., 2015) and significant political and administrative will (Roberts et al., 2012; Roberts et al., 2020b). Securing these requires strong leadership (Douwes et al., 2015), including from local champions (Archer et al., 2014), even when EbA is considered cost-effec…			Community adaptation	Education and play
				1					0	1		1	2	15	15-Small Islands			FAQ	How can climate change affect social inequality in Europe?	2097	The Navunievu community (Bua, Fiji) has mandated that every young adult building their family home in the village should do so upslope rather than on the regularly flooded coastal flat where the existing village is located. Over the next few decades, this will result in the gradual upslope migration of the community, an example of autonomous adaptation. Such creative community-grounded solutions …			Community adaptation	General benefit
				1					0	1		1	2	9	09-Africa		Table 9.13 | Examples of responses to climate change impacts to heritage sites.		9.12.3 Adaptation	1398	Langiage: !Xun and Khwe Indigenous Youth of South Africa Climate variability causing drought and loss of plants Groups (youth			Community adaptation	General benefit
	1								1	0	1		2	18	18-Climate Resilient Development Pathways		18.5	Sectoral and Regional Synthesis of Climate Resilient Developmen	Table 18.7 | Sectoral synthesis of dimensions of climate resilient development.	2728	Improved maternal and child health services (Table 7.2)			Economic/health/social systems and protection	Health
	1								1	0	1		2	12	12-Central and South America		12.5	Adaption	12.5.6 Health and Well-being	1745	Another example of a public adaptation measure is the protection and restoration of natural areas, which have the potential to decrease the transmission of water- and vector-borne infectious diseases (medium confidence: robust evidence, low agreement). Studies have shown that these measures can diminish the cases of malaria and diarrhoea in Brazil and cases of diarrhoea in children in Colombia			Community adaptation	Health
	1								1	0	1		3	9		09-Buildings	9.8	Links to sustainable development	9.8.2.1 Lack of access to clean energy	1001	Electrification of households in rural or remote areas results also to significant health benefits. For 2 example, in El Salvador, rural electrification of households leads to reduced overnight air pollutants 3 concentration by 63% due to the substitution of kerosene as a lighting source, and 34-44% less acute 4 respiratory infections among children under six (Torero 2015). In addition, the conne…			Built environment	Health
	1								1	0	1		2	9	09-Africa		9.1		9.10.3 Adaptation for Health and Well-being in Africa	1382	Many health conditions associated with climate change are not new, and existing evidence-based interventions can be modified to address shifting disease patterns (Ebi and Otmani Del Barrio, 2017). Adaptation options can build on a long tradition of community-based services in Africa (Ebi and Otmani Del Barrio, 2017). Indeed, strengthening many of the services already provided (e.g., childhood vac…			Economic/health/social systems and protection	Health
				1					0	1		1	2	7	07-Health, Wellbeing and the Changing Structure of Communities		7.4		7.4.2.7 Adaptation Options for Risks to Mental Health	1113	Key elements of successful initiatives include coordinated planning and action between key regional agencies and governments with a focus on improving accountability and removing barriers to implementation and subsequent access to programmes (Ali et al., 2020). As an example, following the 2019/2020 Australian bushfires, the federal government allocated funds to support mental health through free…			Economic/health/social systems and protection	Health
	1								1	0	1		2	4	04-Water		4.7	Benefits and Effectiveness of WaterRelated Adaptations, Their Limits and Trade-Off	BOX 4.9 " Illustrative examples of adaptation responses and their benefits across different outcome indicators	642	Water, sanitation and health WaSH programme Children: prevalence of childhood diarrhoea reduced by 35% in midline prevalence, 8.9% and by 73% in end line prevalence, 3.6% compared to baseline prevalence 13.7%. Inferences are causal.			Economic/health/social systems and protection	Health
				1					0	1		1	2	9	09-Africa		9.1		9.10.3.3 Health Financing	1383	New economic models have been implemented in north Africa, focused on poor households, youth and women that enable access to credit and support the implementation of policies that balance cash and food crops, social safety nets and social protection (Mumtaz and Whiteford, 2017; Narayanan and Gerber, 2017; see also Sections 9.4; 9.8; 9.11).			Economic/health/social systems and protection	Livelihoods
				1					0	1		1	2	9	09-Africa		9.12		9.12.1 Observed Impacts on Cultural Heritage.	1395	Migration related to climate change and climatic events could offer openings to women and young people to become de facto family heads (Kaag et al., 2019). However, such societal changes also increase community vulnerability to the loss of cultural knowledge held by village elders. For example, in Mauritius, the Sega tambour Chagos music is at risk, as elders familiar with the landscape pass on (…			Economic/health/social systems and protection	Livelihoods
	1								1	0	1		3	12		12-Cross sectoral Perspectives	12.4	Food systems	12.4.4.2 Regulatory and administrative instruments	1293	Marketing regulations: Currently, 16 countries regulate marketing of unhealthy food to children, mainly 26 on television and in schools (Taillie et al. 2019), and many other efforts are ongoing across the globe 27 (European Commission 2019). The aim to counter the increase in obesity in children and target products 28 high in saturated fats, trans-fatty acids, free sugars and/or salt (WHO 2010) w…			Food production/systems	Nutrition
	1								1	0	1		3	12		12-Cross sectoral Perspectives	12.4	Food systems	12.4.4.2 Regulatory and administrative instruments	1293	Strong statutory marketing regulations can significantly reduce the exposure of children to, and sales of, unhealthy food compared with voluntary restrictions (Kovic et al. 2018; Temme et al. 2020).			Food production/systems	Nutrition
				1					0	1		1	2	8	08-Poverty, Livelihoods and Sustainable Development		8.2		8.2.1.7 Linkages Between Climate Change Impacts and Sustainable Development Goals	1186	Income-generation activities were employed to mitigate crop production losses and increase resilience to climate-influenced hazard events within the 258 ha of degraded lands in Gargey Village [in Micronesia]....The project first focused on increasing the capacity development for 1100 residents of Gargey Village, including women and youth, in order to create a base of community knowledge for soil …			Community adaptation	Nutrition
	1								1	0	1		2	7	07-Health, Wellbeing and the Changing Structure of Communities		7-Exec summary		7-Exec summary	1047	Adaptation options to reduce the future risks of malnutrition include access to healthy, affordable, diverse diets from sustainable food systems (high confidence); health services including maternal, child and reproductive health (high confidence); nutrition services, nutrition and shock sensitive social protection (high confidence); water, sanitation and early warning systems (high confidence); …			Economic/health/social systems and protection	Nutrition
	1								1	0	1		2	7	07-Health, Wellbeing and the Changing Structure of Communities		7.4.2.6 Multi-sectoral Adaptation for Risks of Malnutrition		Table 7.7 | Summary of adaptation options for key risks associated with malnutrition.	1111	Adaptation options with high potential for reducing risk associated with malnutrition: Maternal and child health, water and sanitation, gender equality, climate services and social protection mechanisms			Economic/health/social systems and protection	Nutrition
	1								1	0	1		2	5	05-Food, Fibre and Other Ecosystem Products		5.5		5.5.3.2 Impacts of increased temperature on livestock	750	In many LMICs, poultry contribute significantly to rural livelihoods, including via modest improvements in nutritional outcomes of house- hold children (de Bruyn et al., 2018).			Economic/health/social systems and protection	Nutrition
	1								1	0	1		2	5	05-Food, Fibre and Other Ecosystem Products		5.5		5.5.3.2 Impacts of increased temperature on livestock	753	Livestock ownership or switching to smaller, local breeds does not automatically translate into positive nutrition outcomes for women and children, although it may if communities see such animals as suitable for husbandry by women (Chanamuto and Hall, 2015); the relationship is complex (Nyantakyi- Frimpong and Bezner-Kerr, 2015; Dumas et al., 2018).			Food production/systems	Nutrition
	1								1	0	1		3	17		17-Accelerating the Transition in the Context of Sustainable Development	17.3	Assessment of the results of studies where decarbonisation transitions are framed within the context of sustainable development	17.3.3 Cross-sectoral transitions///17.3.3.3 Industry	1755	A number of business associations have developed strategies for sustainable development and climate change, including cooperate social responsibility (CSR). International initiatives have included the 6 promotion of CSR initiatives by international investors in low-income countries to support a broad range of development priorities, including social working conditions, eliminating child labour an…			Economic/health/social systems and protection	Violence & CP
	1								1	0	1		3	15		15-Investment and Finance	15.6	Approaches to accelerate alignment of financial flows with long-term 41 global goals	15.6.7 Development of local capital markets	1603	In March 2020, the UN Principles for Responsible Investment 13 (PRI), had 3,038 members representing 103 trillion USD (UN PRI 2020); another coalition of investors 14 published COVID-19 recovery plans (Investor Agenda 2020) and the Net Zero Asset Managers 15 initiative was launched in December 2020 (NZAM 2020). However, it is still unclear how these 16 pronouncements will be transformed to adequa…			Economic/health/social systems and protection	Violence & CP
	1								1	0	1		3	5		05-Demand, Services and Social Aspects of Mitigation	5.1	FAQs	FAQ 5.1 What can every person do to limit war	572	People can be educated through knowledge transfer so they can act in different roles, and in each role 20, everyone can contribute to limit global warming to 1.5°C. As citizens, with enough knowledge can 21 organise and put political pressure on the system. Role models can set examples to others. Professionals 22 (e.g., engineers, urban planners, teachers, researchers) can change professional sta…			Built Environment	Violence & CP
	1			1					1	1	1	1	2	6	06-Cities Settlements and Key Infrastructure		6.1		6.1.1 Background and Chapter Outline	912	The agreements identify ‘sustainable cities and communities’(SDG11) and‘cities andsubnational authorities’ (Paris Agreement) as important actors in integrating climate and development goals (Sanchez Rodriguez, Ürge-Vorsatz and Barau, 2018). However not all urban SDGs have measurable targets yet, or data, particularly in regard to children and youth, the elderly and disabled (Klopp and Petretta, 2…			Governance and planning	Voice and political engagement			Yes
				1					0	1		1	2	17	17-Decision-Making Options for Managing Risk		17.5	Adaptation Success and Maladaptation, Monitoring, Evaluation and Learning	17.5.1.1.3 Enabling successful adaptation and pre-empting maladaptation	2604	A global assessment of 1682 papers on adaptation responses yields that low-income groups (high agreement, 37% of 1682 articles), women (medium agreement, 20% articles), Indigenous peoples (10%), the elderly (8%), youths (5%), racial and ethnic minorities (4%), and migrants (4%) were the most frequently considered groups in adaptation responses. Individuals with disabilities are the least consider…			Community adaptation				Yes

## Sheet: Fig1
		AR1 1990	AR2 1995	AR3 2001	AR4 2007	AR5 2014			AR1 1990	AR2 1995	AR3 2001	AR4 2007	AR5 2013-14	AR6 2021-22
WGII	Total	2	6	37	75	143		Total	5	22	48	89	162	330
	SPM	0	2	1	6	1		Children	1	22	34	75	138	242	0.733333
	TS	N/A	12	1	6	10		Youth	4	0	14	14	24	88	0.266667
	Main Report	2	4	35	63	132
WGIII	Total	3	16	11	14	19
	SPM	0	1	0	0	0
	TS	N/A	2	0	2	1
	Main Report	3	15	11	12	18
WGII SPM	Baby	0	0	0	0	0
	Infant	0	0	0	0	0
	Children	0	2	1	6	1
	Youth	0	0	0	0	0
	Young people Young person Young woman Young women Young man Young men	0	0	0	0	0
	Adolescent	0	0	0	0	0
	Girl	0	0	0	0	0
	Boy	0	0	0	0	0
	Teenager	0	0	0	0	0
	Minor(s)	0	0	0	0	0
WGII TS	Baby		0	0	0	0
	Infant		0	0	0	0
	Children		12	1	6	10
	Youth		0	0	0	0
	Young people Young person Young woman Young women Young man Young men		0	0	0	0
	Adolescent		0	0	0	0
	Girl		0	0	0	0
	Boy		0	0	0	0
	Teenager		0	0	0	0
	Minor(s)		0	0	0	0
WGII Main	Baby	0	0	0	0	0
	Infant	0	4	6	2	4
	Children	1	0	18	45	98
	Youth	1	0	2	2	7
	Young people Young person Young woman Young women Young man Young men	0	0	9	12	16
	Adolescent	0	0	0	0	0
	Girl	0	0	0	2	5
	Boy	0	0	0	0	2
	Teenager	0	0	0	0	0
	Minor(s)	0	0	0	0	0
WGIII SPM	Baby	0	0	0	0	0
	Infant	0	0	0	0	0
	Children	0	1	0	0	0
	Youth	0	0	0	0	0		2
	Young people / man etc	0	0	0	0	0
	Adolescent	0	0	0	0	0
	Girl	0	0	0	0	0
	Boy	0	0	0	0	0
	Teenager	0	0	0	0	0
	Minor(s)	0	0	0	0	0
WGIII TS	Baby		0	0	0	0
	Infant		0	0	0	0
	Children		2	0	2	1
	Youth		0	0	0	0
	Young people Young person Young woman Young women Young man Young men		0	0	0	0
	Adolescent		0	0	0	0
	Girl		0	0	0	0
	Boy		0	0	0	0
	Teenager		0	0	0	0
	Minor(s)		0	0	0	0
WGIII Main	Baby	0	0	0	0	0
	Infant	0	4	0	0	1
	Children	0	11	8	12	15
	Youth	2	0	0	0	0
	Young people Young person Young woman Young women Young man Young men	1	0	3	0	1
	Adolescent	0	0	0	0	1
	Girl	0	0	0	0	0
	Boy	0	0	0	0	0
	Teenager	0	0	0	0	0
	Minor(s)	0	0	0	0	0

## Sheet: Fig2 Counts
				327
	WG TWO		WG THREE		Total
	n	%	n	%
Children	209	0.762774	31	0.584906	240	0.733945
Youth	65	0.237226	22	0.415094	87	0.266055
Total by WG	274	0.83792	53	0.16208	327
Total
Rows in spreadsheet	308
Total refs to children and youth	327	19 refs included children and youth
Risks
Rows in spreadsheet	201	Refs with at least 1 risk
Total refs to risk	294	Refs for both children and youth are double counted
Responses
Rows in spreadsheet	107	Refs with at least 1 response
Total refs to responses	114	Refs for both children and youth are double counted
Line List
Rows in spreadsheet	80
Child	62	0.258333	of all refs to children
Youth	28	0.321839	of all refs to youth
Total refs with line list	90	0.275229	of all refs to children and youth
Flow diagram -- https://sankeymatic.com/build/
References to children or youth: WGII [274] Total
References to children and youth: WGIII [53] Total
							Total [240] Children
Total [213] Climate risks							Total [87] Youth
Total [114] Climate responses
							Children [183] Climate risks
Climate risks [183] Children	0.859155						Children [57] Climate responses
Climate risks [30] Youth	0.140845
							Youth [30] Climate risks
Climate responses [57] Children							Youth [57] Climate responses
Climate responses [57] Youth
----
Children [273] Climate risks
Children [57] Climate responses
Climate risks	[96]	Physical health
Climate risks	[60]	Nutrition
Climate risks	[31]	Mortality
Climate risks	[21]	WASH
Climate risks	[15]	Education and play
Climate risks	[14]	General burden
Climate risks	[12]	Violence & CP
Climate risks	[11]	Livelihoods
Climate risks	[10]	Mental health
Climate risks	[3]	Migration
Climate responses	[2]	Collective action and social organising
Climate responses	[10]	Participatory governance and planning
Climate responses	[3]	Climate-change education
Climate responses	[7]	Community adaptation
Climate responses	[16]	Economic/health/social systems and protection
Climate responses	[4]	Food production/systems
Climate responses	[1]	Litigation
Climate responses	[14]	Built Environment

## Sheet: Fig3 WG-Two
Working Group II
	Children	Youth	Children	Youth
00-Summary for Policymakers	2	2	0.00956938	0.0307692
01-Point of Departure and Key Concepts	0	3	0	0.0461538
02-Terrestrial and Freshwater Ecosystems and Their Services	2	0	0.00956938	0
03-Ocean and coastal ecosystems and their services
04-Water	15	2	0.0717703	0.0307692
05-Food, Fibre and Other Ecosystem Products	19	7	0.0909091	0.107692
06-Cities Settlements and Key Infrastructure	17	11	0.0813397	0.169231
07-Health, Wellbeing and the Changing Structure of Communities	45	9	0.215311	0.138462
08-Poverty, Livelihoods and Sustainable Development	20	5	0.0956938	0.0769231
09-Africa	42	10	#REF!	0.646154
10-Asia	11	1	0.0526316	0.0153846
11-Australasia	1	2	0.00478469	0.0307692
12-Central and South America	6	2	0.0287081	0.0307692
13-Europe	3	2	0.0143541	0.0307692
14-North America	3	1	0.0143541	0.0153846
15-Small Islands	1	3	0.00478469	0.0461538
16-Key Risks across Sectors and Regions	14	1	0.0669856	0.0153846
17-Decision-Making Options for Managing Risk	1	3	0.00478469	0.0461538
18-Climate Resilient Development Pathways	7	1	0.0334928	0.0153846
	209	65	1	1		274
																	Number of references in Working Group II

## Sheet: Fig3 WG-Three
Working Group III
	Children	Youth	Children	Youth
00-Summary for Policymakers	0	3	0	0.136364
01-Introduction and Framing	1	1	0.0322581	0.0454545
02-Emissions Trends and Drivers	1	1	0.0322581	0.0454545
03-Mitigation pathways compatible with long-term goals
04-Mitigation pathways compatible with long-term goals
05-Demand, Services and Social Aspects of Mitigation	2	4	0.0645161	0.181818
06-Energy Systems	1	0	0.0322581	0
07-Agriculture, Forestry, and Other Land Uses (AFOLU)
08-Urban systems and other settlements
09-Buildings	12	1	0.387097	0.0454545
10-Transport
11-Industry
12-Cross sectoral Perspectives	8	1	0.258065	0.0454545
13-National and Sub-national Policies and Institutions	1	2	0.0322581	0.0909091
14-International Cooperation	1	5	0.0322581	0.227273
15-Investment and Finance	2	0	0.0645161	0
16-Innovation, Technology Development and Transfer	0	2	0	0.0909091
17-Accelerating the Transition in the Context of Sustainable Development	2	2	0.0645161	0.0909091
	31	22	1	1		53
																	Number of references in Working Group II

## Sheet: Fig4 Risks
	183	30	213
	0.859155	0.140845	0.645455
	90	5	95
Update cells below based on pivot table
	TOTAL
	Children	Youth	Children	Youth
Physical health	96	2	0.351648	0.0571429
Nutrition	60	2	0.21978	0.0571429
Mortality	31	1	0.113553	0.0285714
WASH	21	0	0.0769231	0
Education and play	15	3	0.0549451	0.0857143
General burden	14	8	0.0512821	0.228571
Violence & Child protection	12	1	0.043956	0.0285714
Livelihoods	11	6	0.040293	0.171429
Mental health	10	8	0.03663	0.228571
Migration	3	4	0.010989	0.114286
Total	273	35
	0.886364	0.113636
Refs with at least 1 risk	213	(Note: Some risks are counted twice for children and youth)
Total risks	308
Total refs to children & youth	327
Risks for children and youth across WG II and WG III reports

## Sheet: Fig5a Responses
	57	57
Total responses	114
Total references	327
	0.348624
	Children	Children	Youth	Youth	Total
Collective action and social organising	2	0.0350877	25	0.438596	27	0.236842
Governance and planning	10	0.175439	15	0.263158	25	0.219298
Economic/health/social systems and protection	16	0.280702	3	0.0526316	19	0.166667
Built Environment	14	0.245614	0	0	14	0.122807
Community adaptation	7	0.122807	5	0.0877193	12	0.105263
Climate-change education	3	0.0526316	5	0.0877193	8	0.0701754
Food production/systems	4	0.0701754	3	0.0526316	7	0.0614035
Litigation	1	0.0175439	1	0.0175439	2	0.0175439
	57	1	57	1	114

## Sheet: Fig 5b Co-benefits table
Category of Response	Sample Quote	Co-benefit	Co-benefit count
Collective action and social organising (Total 27)	‘Climate social movements . . . aim to increase a sense of agency amongst certain social groups (e.g. young people or indigenous communities) that structural change is possible.’ (WGIII, Ch 5, p 557) (cobenefit: voice and political engagement)	Voice and political engagement	2
		No co-benefit specified	25	27
Governance and planning (Total 25)	‘[P]olycentric governance can enable improved water governance and effective climate change adaptation (medium confidence). However, it can also exacerbate existing inequalities as long as less powerful actors, such as women, Indigenous Peoples and young people, are not adequately involved in the decision-making process (high confidence).’ (WGII, Ch 6, p 973) (co-benefit: general benefit)	Voice and political engagement	8
		General Benefit	6
		Nutrition	2
		No co-benefit specified	9	25
Economic/health/social systems and protection (Total 19)	‘Adaptive social protection programmes and mechanisms that can support food insecure households and individuals include cash transfers or public work programmes, land reforms, and extension of credit and insurance services that reduce food insecurity and malnutrition during times of environmental stress.’ (WGII, Ch 7, p 1112) (co-benefit: nutrition)	Health	5
		Nutrition	4
		General benefit	4
		Education and Play	2
		Violence & CP	2
		Livelihoods	2	19
Built environment (Total 14)	‘Efficient cook-stoves and improved access to electricity and clean fuels in developing countries will result in substantial time savings for women and children, thus increasing the time for rest, communication, education and productive activities.’ (WGIII, Ch 9, p1000) (co-benefit: education and play)	Education and play	7
		Violence & CP	3
		Health	2
		Livelihoods	2	14
Community adaptation (Total 11)	‘[T]he protection and restoration of natural areas [has] the potential to decrease the transmission of water- and vector-borne infectious diseases (medium confidence: robust evidence, low agreement). Studies have shown that these measures can diminish the cases of malaria and diarrhoea in Brazil and cases of diarrhoea in children in Colombia.’ (WGII, Ch 12, p 1745) (co-benefit: health)	General benefit	4
		Health	3
		Education and play	2
		Nutrition	1
		No co-benefit specified	1	11
Climate-change education (Total 9)	‘Improving ‘climate literacy’ could empower youth, women and men to be active citizens in promoting adherence of governments to international agreements in climate change (Mudombi et al., 2017; Chersich et al., 2019a).’ (WGII, Ch 9, p 1382) (co-benefit: voice and political engagement)	Voice and political engagement	5
		General benefit	2
		No co-benefit specified	2	9
Food production/systems (Total 7)	‘Youth play a critical role in all sectors of the food system (HLPE, 2021; Figure Box 5.13.1) . . . . Agrifood policy implementation of adaptation strategies could increase inclusive participation of youth to meet their needs (HLPE, 2021). Inclusive investments in water management, infrastructure, agrifood science, and policies that increase youth access to land, credit, knowledge, education, ski…	Nutrition	5
		General benefit	1
		No co-benefit specified	1	7
Litigation (Total 2)	‘Youth public trust claims; Government inter-generational liability for inadequate climate change mitigation and adaptation efforts. Our Children’s Trust (a non-profit organisation) and others brought an action against the USA and several executive branch individuals in 2015, claiming damages for their loss of the environment and the defendant’s failure to preserve a habitable climate system by t…	No co-benefit specified	2
		No co-benefit	38
		Co-benefits	76
Total			0.666667
				Total
				213
				2
				25
				27
				9
				2
				6
				8
				25
				1
				1
				5
				2
				9
				1
				1
				2
				4
				3
				11
				1
				1
				5
				7
				2
				2
				2
				4
				5
				4
				19
				2
				2
				2
				2
				3
				7
				14
Built environment	Education and play	7
	Health	2
	Livelihoods	2
	Violence & CP	3
Built environment Total		14
Climate-change education	Education and play	1
	General benefit	2
	Voice and political engagement	5
Climate-change education Total		8
Collective action and social organising		25
	Voice and political engagement	2
Collective action and social organising Total		27
Community adaptation		2
	Education and play	2
	General benefit	4
	Health	3
	Nutrition	1
Community adaptation Total		12
Economic/health/social systems and protection	Education and Play	2
	General benefit	4
	Health	5
	Livelihoods	2
	Nutrition	4
	Violence & CP	2
Economic/health/social systems and protection Total		19
Food production/systems		1
	General benefit	1
	Nutrition	5
Food production/systems Total		7
Litigation		2
Litigation Total		2
Participatory governance and planning		9
	General Benefit	6
	Nutrition	2
	Voice and political engagement	8
Participatory governance and planning Total		25

## Sheet: Fig 6 Lenses
				Lenses (at least 1)
				Children	Youth	Total
				172	74	246
				0.699187	0.300813	0.745455
Second lens
			%Child	%Youth
					(children: n=8, youth; n=20 references).
					(children: n=2, youth; n=26 references).
						Update from above --
	Total					Lens 1		Lens 2
	Child	Child	Youth	Youth		Child	Youth	Child	Youth
Inequality	86	0.353909	17	0.158879		63	11	23	6
Vulnerability	77	0.316872	14	0.130841		58	7	19	7
Gender	45	0.185185	11	0.102804		30	8	15	3
Intersectionality	8	0.0329218	5	0.046729		6	4	2	1
Participation	8	0.0329218	20	0.186916		5	15	3	5
Justice	7	0.0288066	6	0.0560748		4	3	3	3
Rights	5	0.0205761	1	0.00934579		3	1	2	0
Intergenerational justice	3	0.0123457	7	0.0654206		2	5	1	2
Activism	2	0.00823045	26	0.242991		1	20	1	6
Coloniality	2	0.00823045	0	0		1	0	1	0
	243	1	107			173	74	70	33
Total A and P	163		31

## Sheet: AR6 page counts
	WGI	WGII	WGIII	Total
Total page count	2409	3068	2042
Cross chapters	348	685
Technical summary	96	83	101
Annexes & Index	331	247	249
References	377	622	444
Page count for NCC analysis	1257	1431	1248	3936
Total references child + youth	327
1 reference every X pages of AR6	12.0367
1 reference every X pages of WII and WGIII	8.19266

[truncated: 1 more sheets: TableS1]
